# Supplementary material for: Synthesis, X-ray powder diffraction and DFT-D studies of indole-based compounds
Source: publisher site journal article supplement (doi:10.1515/zkri-2017-2106), 2017-12-03
Supplement: Supplementary file 1 [file Supplementary material_Andy.pdf › Supplementary material_Andy.pdf]

# Synthesis, X-ray powder diffraction and DFT-d studies of indole-based compounds

ElSayed M. Shalaby\*, Aladdin M. Srour, Siva S. Panda, Riham F. George, Andrew N. Fitch and Adel S. Girgis\*

**\*Corresponding authors: ElSayed M. Shalaby**, X-Ray Crystallography Lab., Physics Division, National Research Centre, Dokki, Giza 12622, Egypt, E-mail: sayedshalaby@gmail.com; **Adel S. Girgis**, Pesticide Chemistry Department, National Research Centre, Dokki, Giza 12622, Egypt, E-mail: girgisas10@yahoo.com

**Aladdin M. Srour**: Therapeutical Chemistry Department, National Research Centre, Dokki, Giza 12622, Egypt

**Siva S. Panda**: Department of Chemistry & Physics, Augusta University, Augusta, GA 30912, USA

**Riham F. George**: Pharmaceutical Chemistry Department, Faculty of Pharmacy, Cairo University, Cairo, Egypt

**Andrew N. Fitch**: European Synchrotron Radiation Facility, CS40220, 38043 Grenoble Cedex 9, France

## Supplementary material

### Table titles

**Table 1.** Selected intramolecular experimental (X-ray) and computational optimized geometrical parameters (bond lengths, Å) of compounds **4a–d**.

**Table S2.** Selected intramolecular experimental (X-ray) and computational optimized geometrical parameters (bond angles, °) of compounds **4a–d**.

**Table S3:** Hydrogen-bond geometry (Å, °) of compound **4a**.

**Table S4:** Hydrogen-bond geometry (Å, °) of compound **4b**.

**Table S5:** Hydrogen-bond geometry (Å, °) of compound **4c**.

**Table S6:** Hydrogen-bond geometry (Å, °) of compound **4d**.

## Figure captions

**Fig. S1.** IR spectrum of compound **4a** (KBr pellet).

**Fig. S2.**  $^1\text{H}$ -NMR spectrum of compound **4a** in  $\text{CDCl}_3$ .

**Fig. S3.**  $^{13}\text{C}$ -NMR spectrum of compound **4a** in  $\text{CDCl}_3$ .

**Fig. S4.** IR spectrum of compound **4b** (KBr pellet).

**Fig. S5.**  $^1\text{H}$ -NMR spectrum of compound **4b** in  $\text{CDCl}_3$ .

**Fig. S6.**  $^{13}\text{C}$ -NMR spectrum of compound **4b** in  $\text{CDCl}_3$ .

**Fig. S7.** IR spectrum of compound **4c** (KBr pellet).

**Fig. S8.**  $^1\text{H}$ -NMR spectrum of compound **4c** in  $\text{CDCl}_3$ .

**Fig. S9.**  $^{13}\text{C}$ -NMR spectrum of compound **4c** in  $\text{CDCl}_3$ .

**Fig. S10.** IR spectrum of compound **4d** (KBr pellet).

**Fig. S11.**  $^1\text{H}$ -NMR spectrum of compound **4d** in  $\text{CDCl}_3$ .

**Fig. S12.**  $^{13}\text{C}$ -NMR spectrum of compound **4d** in  $\text{CDCl}_3$ .

**Fig. S13.** A projection of the optimized structure of compound **4a** by DFT/B3LYP method with 6-31G(d,p) basis set.

**Fig. S14.** A projection of the optimized structure of compound **4b** by DFT/B3LYP method with 6-31G(d,p) basis set.

**Fig. S15.** A projection of the optimized structure of compound **4c** by DFT/B3LYP method with 6-31G(d,p) basis set.

**Fig. S16.** A projection of the optimized structure of compound **4d** by DFT/B3LYP method with 6-31G(d,p) basis set.

**Fig. S17.** Effect of compound **4a** on contracture induced by histamine in isolated guinea pig tracheal rings.

**Fig. S18.** Effect of compound **4b** on contracture induced by histamine in isolated guinea pig tracheal rings.

**Fig. S19.** Effect of compound **4c** on contracture induced by histamine in isolated guinea pig tracheal rings.

**Fig. S20.** Effect of compound **4d** on contracture induced by histamine in isolated guinea pig tracheal rings.

**Fig. S21.** Effect of theophylline on contracture induced by histamine in isolated guinea pig tracheal rings.

**Fig. S22.** Overlay view of compound **4a**, red (X-ray structure), green (free state DFT), yellow (DFT validation).

**Fig. S23.** Overlay view of compound **4b**, red (X-ray structure), green (free state DFT), yellow (DFT validation).

**Fig. S24.** Overlay view of compound **4c**, red (X-ray structure), green (free state DFT), yellow (DFT validation).

**Fig. S25.** Overlay view of compound **4d**, red (X-ray structure), green (free state DFT), yellow (DFT validation).

**Fig. S26.** The molecular structure of compound **4a** showing the atom-labeling scheme and the refined torsion angles (green arrows).

**Fig. S27.** The molecular structure of compound **4b** showing the atom-labeling scheme and the refined torsion angles (green arrows).

**Fig. S28.** The molecular structure of compound **4c** showing the atom-labeling scheme and the refined torsion angles (green arrows).

**Fig. S29.** Crystal packings in **4a**. Dashed lines denote intermolecular interactions.

**Fig. S30.** Crystal packings in **4b**. Dashed lines denote intermolecular interactions.

**Fig. S31.** Crystal packings in **4c**. Dashed lines denote intermolecular interactions.

**Table 1.** Selected intramolecular experimental (X-ray) and computational optimized geometrical parameters (bond lengths, Å) of compounds **4a–d**.

| Geometric parameters | Compd. <b>4a</b>   |        | Compd. <b>4b</b>   |        | Compd. <b>4c</b>   |        | Compd. <b>4d</b>   |        |
|----------------------|--------------------|--------|--------------------|--------|--------------------|--------|--------------------|--------|
|                      | Exp. X-ray<br>data | DFT-d  |
| O1—C1                | 1.4342             | 1.4408 | 1.4393             | 1.44   | 1.4382             | 1.4409 | 1.4472             | 1.4408 |
| O1—C2                | 1.3391             | 1.3455 | 1.3437             | 1.3473 | 1.3474             | 1.349  | 1.3757             | 1.3507 |
| N1—C2                | 1.3116             | 1.3249 | 1.3108             | 1.3254 | 1.3219             | 1.3225 | 1.29               | 1.3216 |
| C2—C3                | 1.4136             | 1.4185 | 1.4124             | 1.4197 | 1.4035             | 1.4184 | 1.4136             | 1.4178 |
| C3—C4                | 1.4193             | 1.4094 | 1.4274             | 1.4124 | 1.4513             | 1.411  | 1.411              | 1.4078 |
| N2—C4                | 1.1574             | 1.1842 | 1.1457             | 1.1847 | 1.1392             | 1.1851 | 1.1631             | 1.1853 |
| C3—C5                | 1.4084             | 1.4153 | 1.396              | 1.4153 | 1.3802             | 1.4176 | 1.3889             | 1.4187 |
| C5—C6                | 1.4549             | 1.4546 | 1.4686             | 1.4556 | 1.4648             | 1.4561 | 1.4293             | 1.4519 |
| C6—C7                | 1.3759             | 1.3879 | 1.3592             | 1.3879 | 1.3493             | 1.3868 | 1.3577             | 1.3897 |
| N3—C7                | 1.3624             | 1.3721 | 1.3526             | 1.3718 | 1.3745             | 1.3702 | 1.3427             | 1.3664 |
| N3—C22               | 1.4525             | 1.4648 | 1.4599             | 1.4516 | 1.4692             | 1.459  | 1.4898             | 1.4598 |
| N3—C8                | 1.3789             | 1.3885 | 1.3701             | 1.3877 | 1.3838             | 1.3876 | 1.373              | 1.3865 |
| C8—C9                | 1.3913             | 1.3969 | 1.4004             | 1.3965 | 1.4032             | 1.3952 | 1.377              | 1.3938 |
| C9—C10               | 1.3821             | 1.3904 | 1.3759             | 1.3898 | 1.3593             | 1.3896 | 1.3784             | 1.3877 |
| C10—C11              | 1.4011             | 1.4058 | 1.3854             | 1.4062 | 1.3985             | 1.4062 | 1.4138             | 1.4053 |

|         |             |        |          |        |             |        |             |        |
|---------|-------------|--------|----------|--------|-------------|--------|-------------|--------|
| C11—C12 | 1.3826      | 1.3883 | 1.3817   | 1.3891 | 1.3779      | 1.3888 | 1.3775      | 1.3899 |
| C12—C13 | 1.3989      | 1.4041 | 1.394    | 1.4046 | 1.3913      | 1.4035 | 1.399       | 1.4057 |
| C8—C13  | 1.4115      | 1.4214 | 1.4213   | 1.4229 | 1.4038      | 1.4236 | 1.4214      | 1.4237 |
| C6—C13  | 1.4449      | 1.4436 | 1.4375   | 1.4457 | 1.4426      | 1.4451 | 1.4325      | 1.448  |
| C5—C14  | 1.398       | 1.4025 | 1.3901   | 1.4035 | 1.4095      | 1.4022 | 1.3914      | 1.4012 |
| C14—C15 | 1.3839      | 1.3941 | 1.3874   | 1.3942 | 1.382       | 1.3962 | 1.3773      | 1.3952 |
| N1—C15  | 1.3437      | 1.3579 | 1.3603   | 1.3591 | 1.3524      | 1.3572 | 1.3727      | 1.3583 |
| C15—C16 | 1.478       | 1.475  | 1.4702   | 1.4769 | 1.4726      | 1.4736 | 1.4721      | 1.4695 |
| C16—C17 | 1.3965      | 1.4025 | 1.3952   | 1.4037 | 1.387       | 1.4053 | 1.395       | 1.406  |
| C17—C18 | 1.3854      | 1.3865 | 1.3812   | 1.3875 | 1.3855      | 1.3861 | 1.3703      | 1.3808 |
| C18—C19 | 1.3888      | 1.394  | 1.3746   | 1.3951 | 1.382       | 1.4018 | 1.3805      | 1.4021 |
| C19—C20 | 1.3884      | 1.3939 | 1.372    | 1.3951 | 1.3682      | 1.3998 | 1.3807      | 1.4    |
| C20—C21 | 1.3851      | 1.3916 | 1.3937   | 1.3884 | 1.3771      | 1.3891 | 1.3782      | 1.3884 |
| C16—C21 | 1.3986      | 1.4031 | 1.3867   | 1.4038 | 1.3776      | 1.4009 | 1.3858      | 1.4    |
| O2—C19  |             |        |          |        |             |        | 1.3748      | 1.3631 |
| O2—C24  |             |        |          |        |             |        | 1.4197      | 1.4332 |
| C22—C23 | 1.524       | 1.5161 |          |        | 1.4749      | 1.5236 | 1.5264      | 1.5243 |
| C19—C24 |             |        |          |        | 1.5288      | 1.4984 |             |        |
| Cl1—C19 |             |        | 1.7461   | 1.7273 |             |        |             |        |
| RMSE    | 0.009067929 |        | 0.015306 |        | 0.021757957 |        | 0.017200336 |        |

|                    |        |       |        |       |
|--------------------|--------|-------|--------|-------|
| Maximum difference | 0.0268 | 0.039 | 0.0487 | 0.032 |
|--------------------|--------|-------|--------|-------|

**Table S2.** Selected intramolecular experimental (X-ray) and computational optimized geometrical parameters (bond angles, °) of compounds **4a–d**.

| Geometric parameters | Compd. <b>4a</b>   |        | Compd. <b>4b</b>   |        | Compd. <b>4c</b>   |        | Compd. <b>4d</b>   |        |
|----------------------|--------------------|--------|--------------------|--------|--------------------|--------|--------------------|--------|
|                      | Exp. X-ray<br>data | DFT-d  |
| C1—O1—C2             | 117.63             | 118.25 | 118.5              | 118.22 | 117.71             | 116.83 | 116.27             | 117.26 |
| C7—N3—C22            | 125.98             | 127.31 | 126.08             | 125.6  | 125.58             | 125    | 125.27             | 125.29 |
| O1—C2—C3             | 116.48             | 116.19 | 114.52             | 115.82 | 115.54             | 116.69 | 112.7              | 115.99 |
| C2—C3—C5             | 117.85             | 117.76 | 117.47             | 117.86 | 118.53             | 117.78 | 119.73             | 117.89 |
| C3—C5—C6             | 124.23             | 122.78 | 123.03             | 122.96 | 123.86             | 122.34 | 124.44             | 123.02 |
| C5—C6—C7             | 127.86             | 127.43 | 126.91             | 126.69 | 125.59             | 125.9  | 128.24             | 126.22 |
| N3—C7—C6             | 110.64             | 110.43 | 111.42             | 110.55 | 111.33             | 110.7  | 111.13             | 110.81 |
| C9—C8—C13            | 122.5              | 122.6  | 122.11             | 122.85 | 123.07             | 122.81 | 124.33             | 122.96 |
| C10—C11—C12          | 121.18             | 121.16 | 120.48             | 121.24 | 121.14             | 121.26 | 120.57             | 121.26 |
| C6—C13—C12           | 134.99             | 134.56 | 134.84             | 134.71 | 135.06             | 134.74 | 138.78             | 135.22 |
| N1—C15—C14           | 121.24             | 121.05 | 121.42             | 121.16 | 121.88             | 121.06 | 121.15             | 120.96 |
| C15—C16—C17          | 119.64             | 119.04 | 120.16             | 119.49 | 119.73             | 119.42 | 120.8              | 119.55 |
| C16—C17—C18          | 120.65             | 121.03 | 122.16             | 121.61 | 121.05             | 121.26 | 121.9              | 121.66 |
| C16—C21—C20          | 120.82             | 120.67 | 121.75             | 121.32 | 121.88             | 120.93 | 123.59             | 122.01 |
| C2—N1—C15            | 119                | 118.74 | 117.28             | 118.6  | 117.16             | 118.89 | 115.82             | 118.5  |

|             |        |        |        |        |        |        |        |        |
|-------------|--------|--------|--------|--------|--------|--------|--------|--------|
| C8—N3—C22   | 125.11 | 124.04 | 125.09 | 125.53 | 126.53 | 126.14 | 126.27 | 125.93 |
| N1—C2—C3    | 123.77 | 123.91 | 125.27 | 124.06 | 124.78 | 123.99 | 125.85 | 124.35 |
| C4—C3—C5    | 122    | 123.45 | 123.38 | 123.51 | 123.26 | 123.53 | 122.81 | 124.58 |
| C3—C5—C14   | 116.63 | 117.02 | 117.27 | 116.95 | 116.77 | 117.06 | 113.56 | 116.49 |
| C5—C6—C13   | 126.11 | 126.38 | 127.05 | 127.3  | 128.21 | 128.13 | 124.67 | 127.95 |
| N3—C8—C9    | 129.46 | 129.46 | 130.3  | 129.39 | 128.89 | 129.36 | 127.44 | 129.05 |
| C8—C9—C10   | 117.72 | 117.36 | 116.33 | 117.23 | 116.79 | 117.33 | 117.8  | 117.5  |
| C11—C12—C13 | 119.32 | 119.25 | 119.27 | 119.23 | 119.3  | 119.27 | 121.22 | 119.4  |
| C8—C13—C12  | 118.38 | 118.46 | 118.76 | 118.26 | 118.05 | 118.25 | 115.79 | 117.89 |
| N1—C15—C16  | 116.39 | 115.93 | 115.35 | 116.05 | 115.28 | 115.6  | 112.54 | 115.9  |
| C15—C16—C21 | 121.86 | 122.78 | 122.78 | 122.7  | 123.19 | 122.96 | 123.36 | 123.13 |
| C17—C18—C19 | 120.25 | 120.42 | 118.75 | 119.26 | 120.87 | 121.15 | 120.37 | 120    |
| C18—C19—C20 | 119.72 | 119.17 | 121.44 | 120.48 | 118.08 | 117.55 | 119.74 | 119.5  |
| C7—N3—C8    | 108.7  | 108.64 | 108.71 | 108.76 | 107.66 | 108.67 | 108.45 | 108.71 |
| O1—C2—N1    | 119.72 | 119.87 | 120.2  | 120.11 | 119.64 | 119.31 | 121.43 | 119.65 |
| C2—C3—C4    | 120.05 | 118.47 | 119.13 | 118.56 | 118.19 | 118.57 | 117.32 | 117.47 |
| N2—C4—C3    | 176.87 | 178.14 | 179.06 | 178.6  | 177.62 | 177.95 | 177.15 | 176.74 |
| C6—C5—C14   | 119.09 | 120.11 | 119.7  | 120.09 | 119.35 | 120.6  | 121.99 | 120.49 |
| C7—C6—C13   | 106.03 | 106.19 | 105.95 | 105.99 | 106.2  | 105.96 | 107.02 | 105.81 |
| N3—C8—C13   | 108.03 | 107.89 | 107.53 | 107.74 | 107.94 | 107.76 | 108.21 | 107.92 |



|                    |             |        |             |        |             |        |             |        |
|--------------------|-------------|--------|-------------|--------|-------------|--------|-------------|--------|
| C9—C10—C11         | 120.8       | 121.17 | 123.03      | 121.18 | 121.64      | 121.09 | 120.28      | 120.97 |
| C6—C13—C8          | 106.57      | 106.84 | 106.37      | 106.96 | 106.85      | 106.91 | 105.18      | 106.76 |
| C5—C14—C15         | 121.25      | 121.29 | 121.28      | 121.34 | 120.86      | 121.2  | 123.85      | 121.75 |
| C14—C15—C16        | 122.35      | 123.01 | 123.23      | 122.79 | 122.84      | 123.34 | 126.3       | 123.14 |
| C17—C16—C21        | 118.5       | 118.18 | 117.04      | 117.81 | 117.08      | 117.62 | 115.83      | 117.32 |
| C19—C20—C21        | 120.05      | 120.53 | 118.84      | 119.49 | 121.03      | 121.5  | 118.56      | 119.5  |
| O2—C19—C18         |             |        |             |        |             |        | 118.03      | 116.07 |
| O2—C19—C20         |             |        |             |        |             |        | 122.22      | 124.42 |
| C19—O2—C24         |             |        |             |        |             |        | 118.9       | 117.68 |
| N3—C22—C23         | 113.35      | 113.71 |             |        | 112.2       | 112.83 | 111.49      | 113.27 |
| C18—C19—C24        |             |        |             |        | 121.26      | 121.21 |             |        |
| C20—C19—C24        |             |        |             |        | 120.65      | 121.23 |             |        |
| Cl1—C19—C18        |             |        | 119.48      | 119.98 |             |        |             |        |
| Cl1—C19—C20        |             |        | 119.07      | 119.53 |             |        |             |        |
| RMSE               | 0.631619234 |        | 0.654972039 |        | 0.633425033 |        | 1.735699027 |        |
| Maximum difference | 1.58        |        | 1.85        |        | 1.73        |        | 3.56        |        |

**Table S3:** Hydrogen-bond geometry (Å, °) of compound **4a**.

| <i>D</i> —H... <i>A</i>      | <i>D</i> —H | H... <i>A</i> | <i>D</i> ... <i>A</i> | <i>D</i> —H... <i>A</i> |
|------------------------------|-------------|---------------|-----------------------|-------------------------|
| C9—H9...N2 <sup>i</sup>      | 1.08        | 2.47          | 3.397                 | 143                     |
| C20—H20...O1 <sup>ii</sup>   | 1.08        | 2.50          | 3.0882                | 113                     |
| C19—H19...Cg3 <sup>iii</sup> | 1.08        | 2.99          | 4.0098                | 157                     |
| C22—H22B...Cg1 <sup>i</sup>  | 1.08        | 2.64          | 3.6215                | 150                     |
| C23—H23C...Cg3 <sup>i</sup>  | 1.08        | 2.99          | 3.6617                | 120                     |

Symmetry code: (i) -X, -1-Y, -1-Z; (ii) -1/2+X, -3/2-Y, Z; (iii) -1/2-X, -1/2+Y, -Z.

Cg1: N3—C7—C6—C13—C8.

Cg3: C8—C9—C10—C11—C12—C13.

**Table S4:**  $\pi$ -bond geometry (Å, °) of compound **4b**.

| <i>Y</i> — <i>X</i> ... <i>Cg</i> | <i>Y</i> — <i>X</i> | <i>X</i> ... <i>Cg</i> | <i>Y</i> ... <i>Cg</i> | <i>Y</i> — <i>X</i> ... <i>Cg</i> |
|-----------------------------------|---------------------|------------------------|------------------------|-----------------------------------|
| C19—C1...Cg3 <sup>i</sup>         | 1.7461              | 3.7892                 | 5.4677                 | 161                               |
| C4—N2...Cg4 <sup>ii</sup>         | 1.1456              | 3.9789                 | 4.5246                 | 111                               |

Symmetry code: (i) 4-X, 3-Y, -Z; (ii) -5-X, -3-Y, 1-Z.

Cg3: C8—C9—C10—C11—C12—C13.

Cg4: C16—C17—C18—C19—C20—C21.

**Table S5:** Hydrogen-bond geometry (Å, °) of compound **4c**.

| <i>D</i> —H... <i>A</i>     | <i>D</i> —H | H... <i>A</i> | <i>D</i> ... <i>A</i> | <i>D</i> —H... <i>A</i> |
|-----------------------------|-------------|---------------|-----------------------|-------------------------|
| C20—H201...O1 <sup>ii</sup> | 0.95        | 2.646         | 3.477                 | 146                     |

Symmetry code: (i) X, ½-Y, -½+Z.

**Table S6:** Hydrogen-bond geometry (Å, °) of compound **4d**.

| <i>C</i> —H... <i>Cg</i>             | <i>C</i> —H | H... <i>Cg</i> | <i>C</i> ... <i>Cg</i> | <i>C</i> —H... <i>Cg</i> |
|--------------------------------------|-------------|----------------|------------------------|--------------------------|
| C1—H12... <i>Cg1</i> <sup>i</sup>    | 0.94        | 2.96           | 3.8764                 | 165                      |
| C22—H222... <i>Cg1</i> <sup>ii</sup> | 0.99        | 2.91           | 3.5889                 | 127                      |

Symmetry code: (i) -3-X, 4-Y, -2-Z; (ii) -4-X, 4-Y, -2-Z.

*Cg1*: N3—C7—C6—C13—C8.

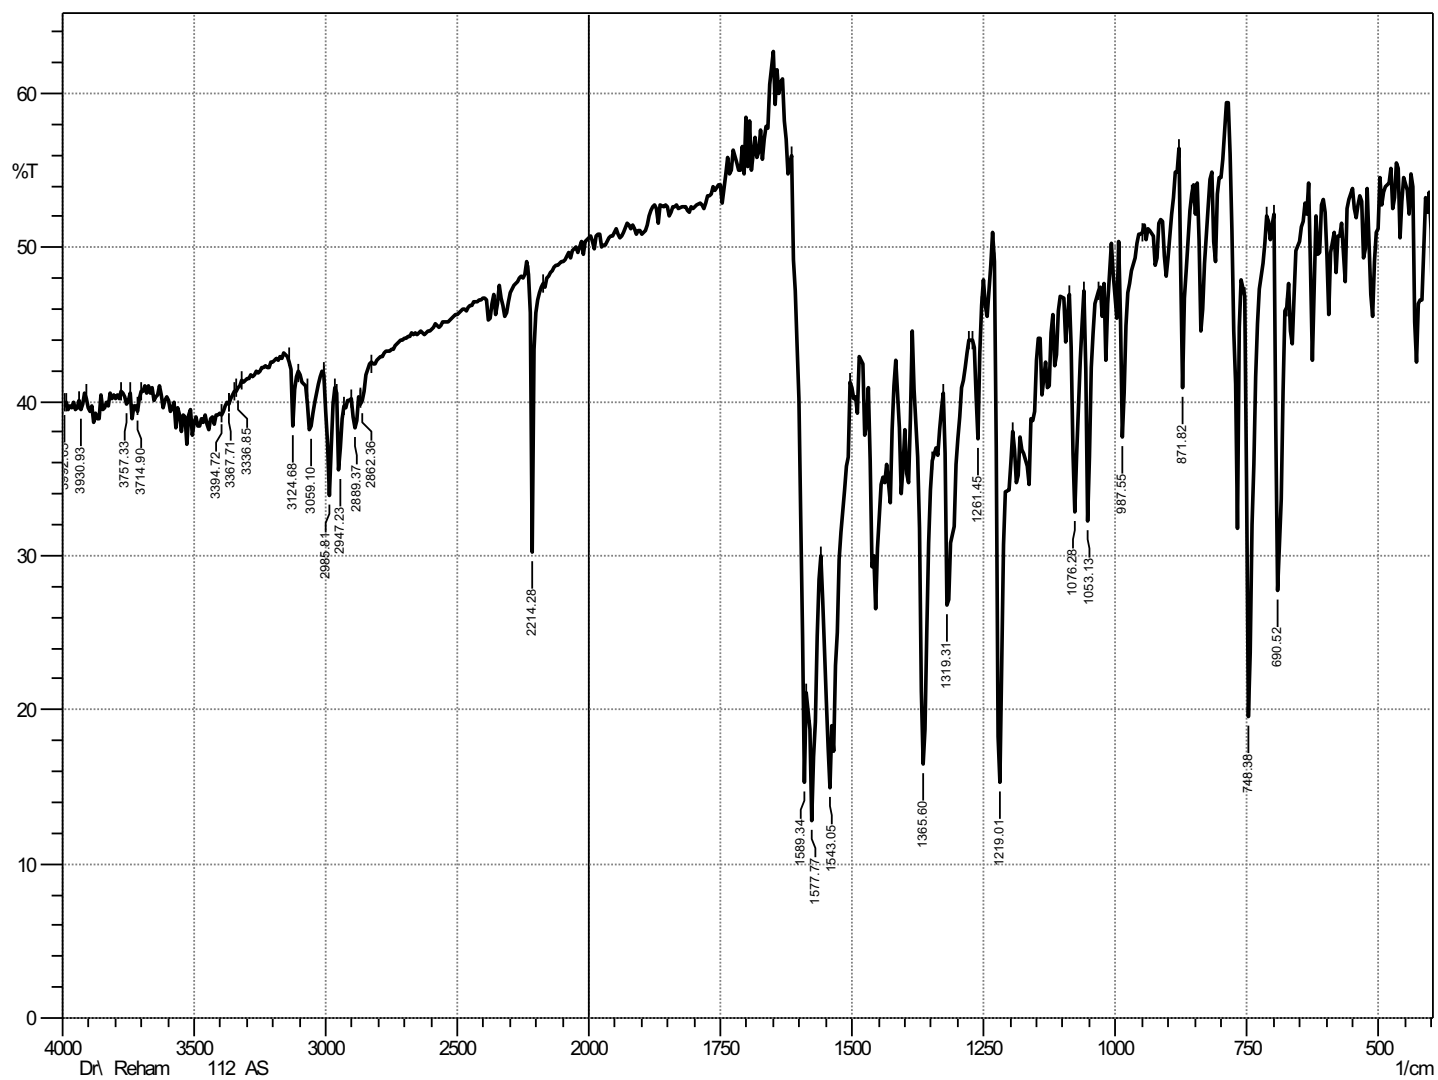

**Fig. S1.** IR spectrum of compound **4a** (KBr pellet).

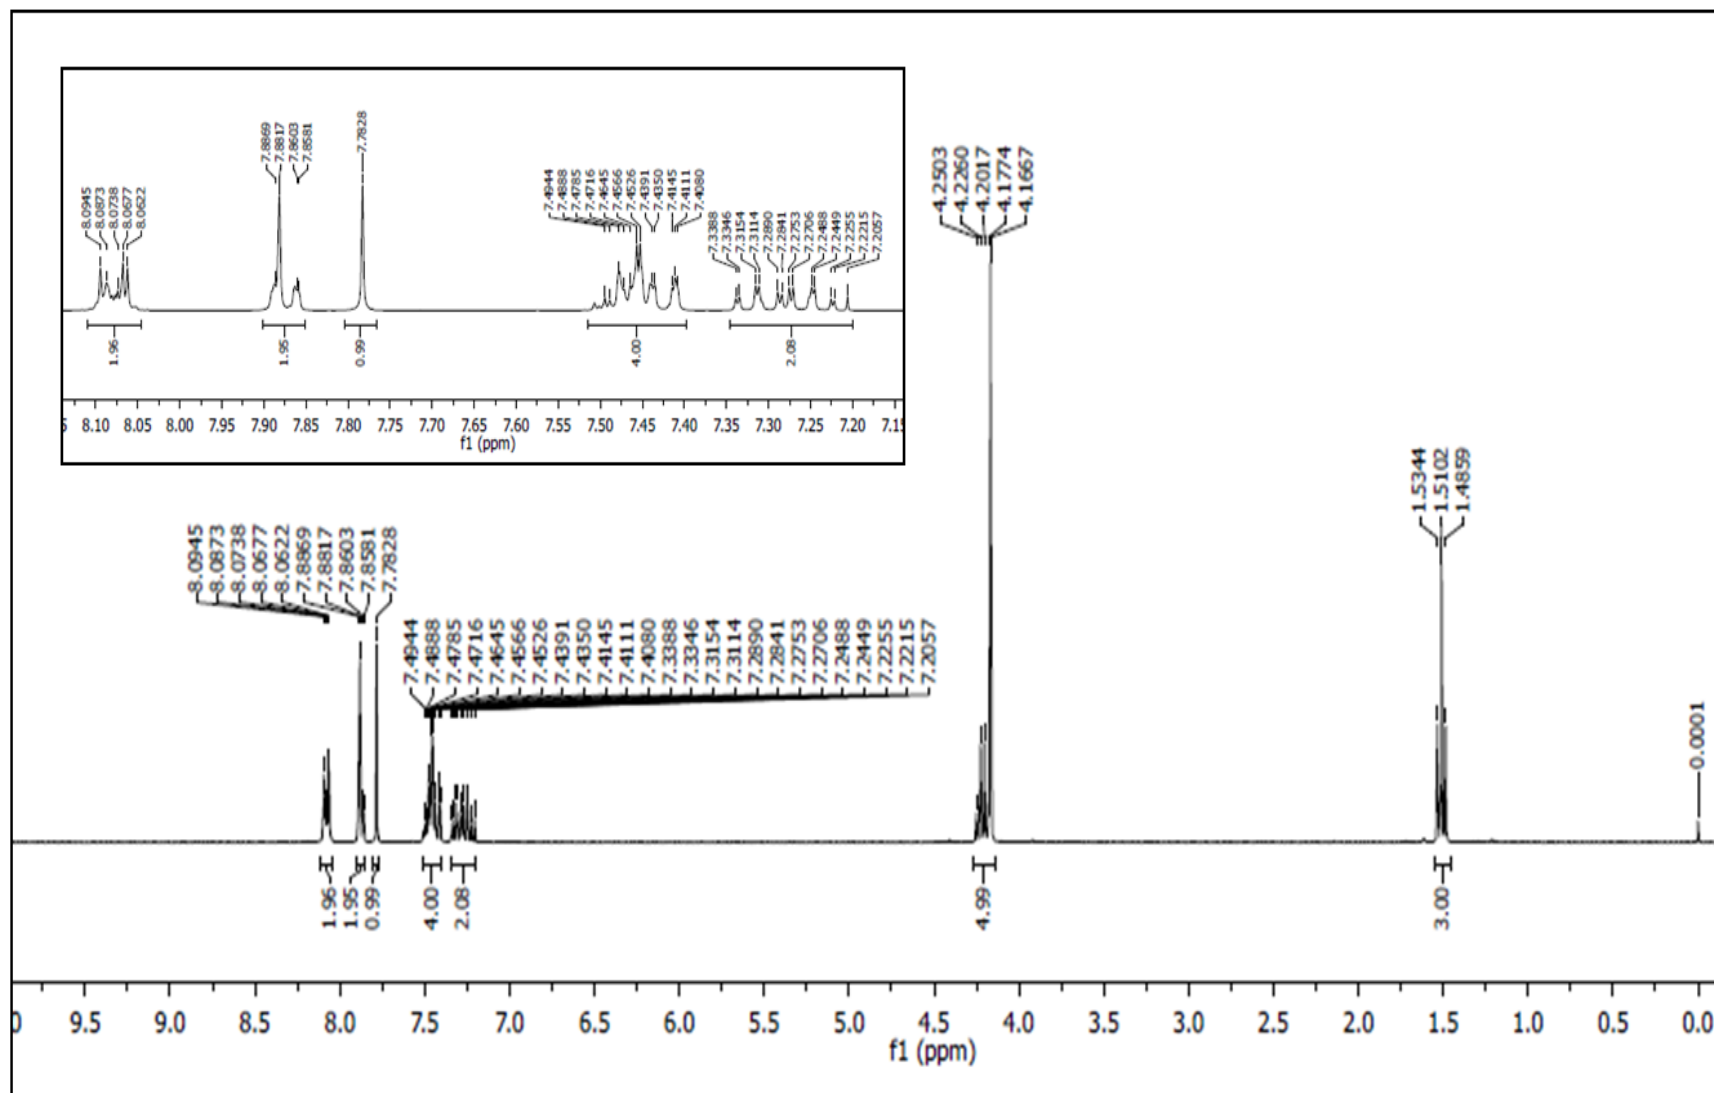

**Fig. S2.**  $^1\text{H}$ -NMR spectrum of compound **4a** in  $\text{CDCl}_3$ .

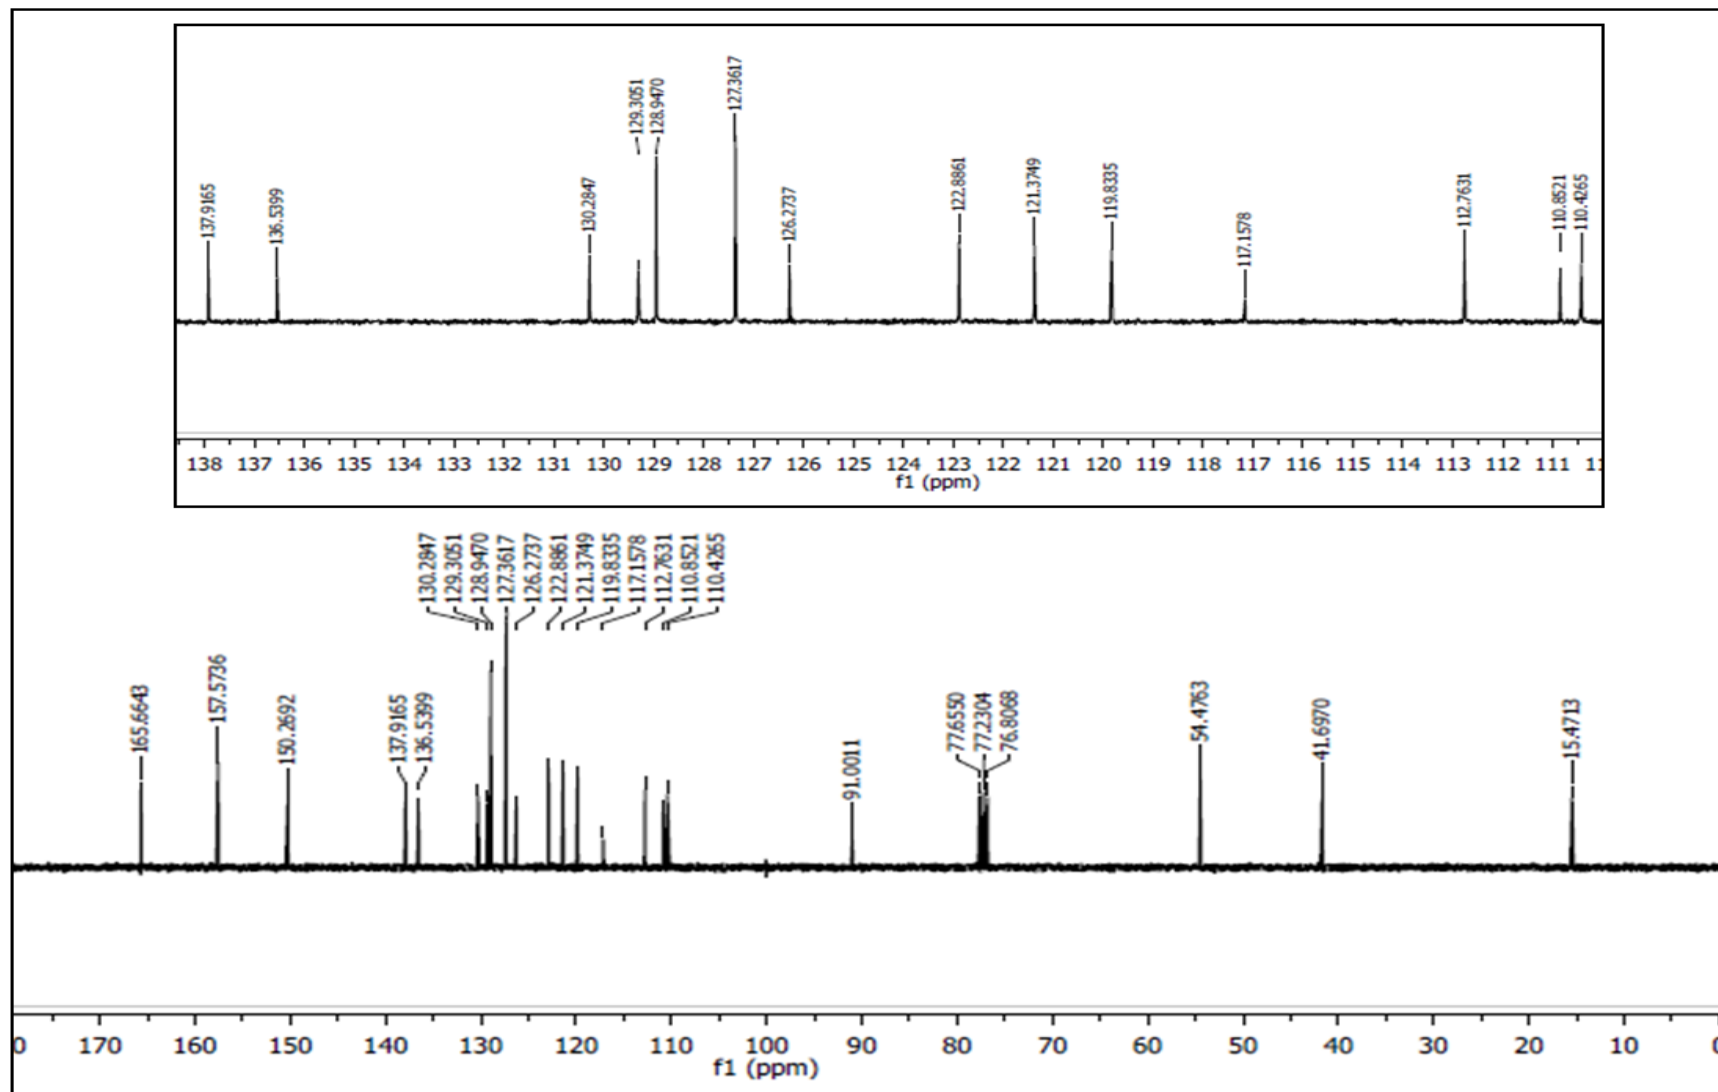

**Fig. S3.**  $^{13}\text{C}$ -NMR spectrum of compound **4a** in  $\text{CDCl}_3$ .

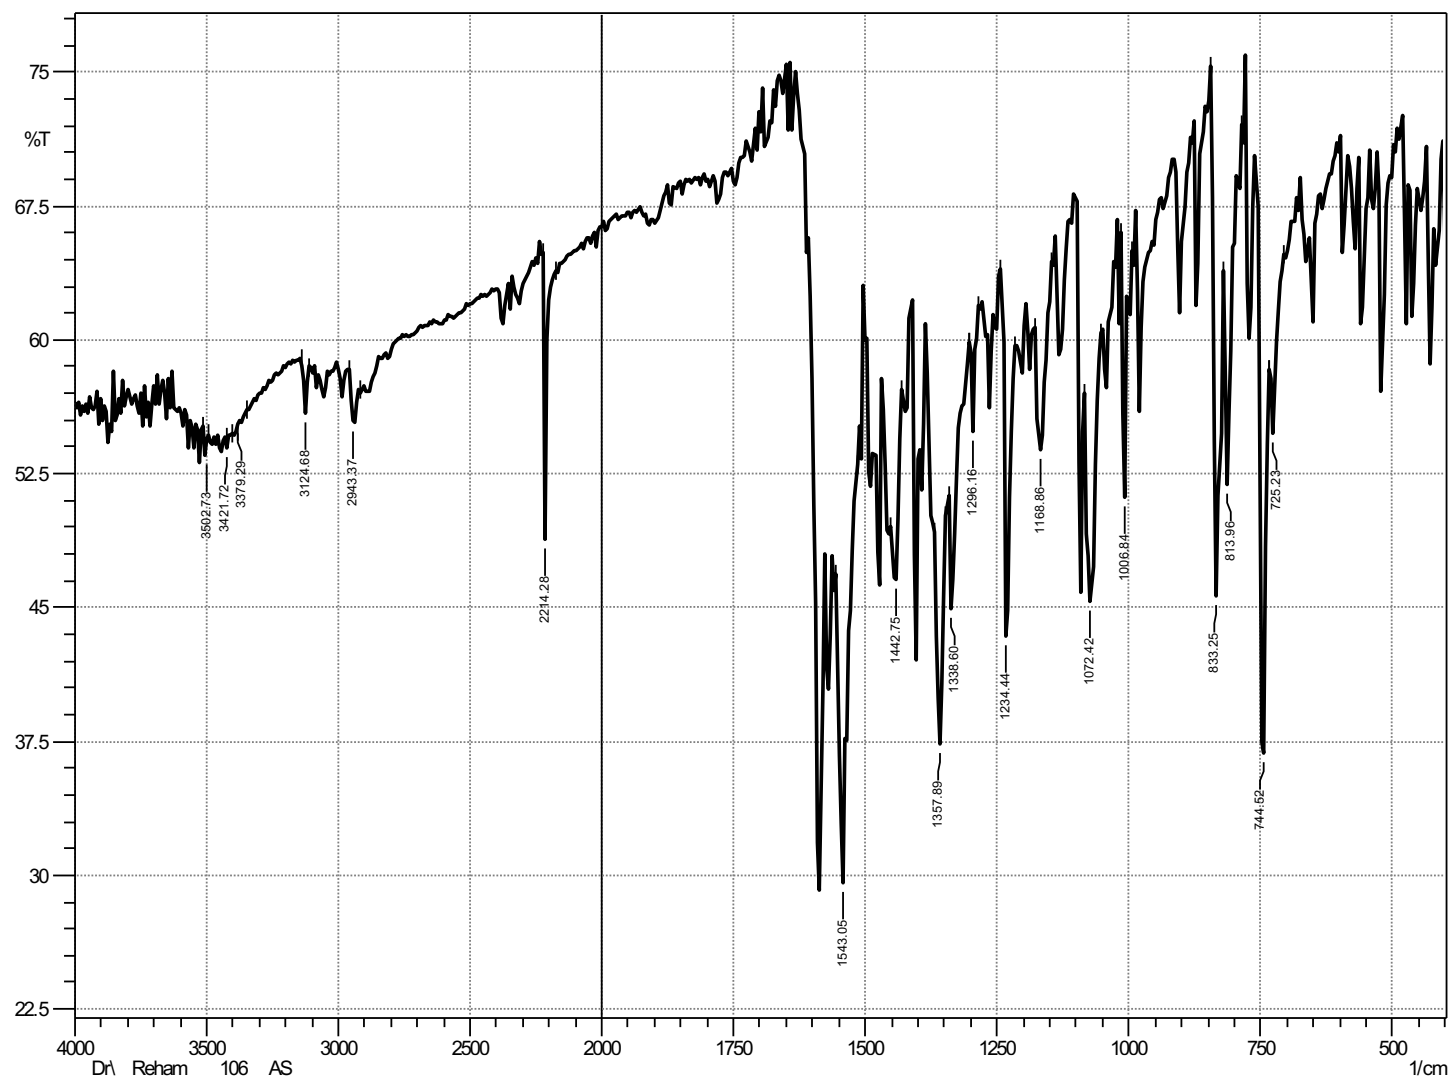

**Fig. S4.** IR spectrum of compound **4b** (KBr pellet).

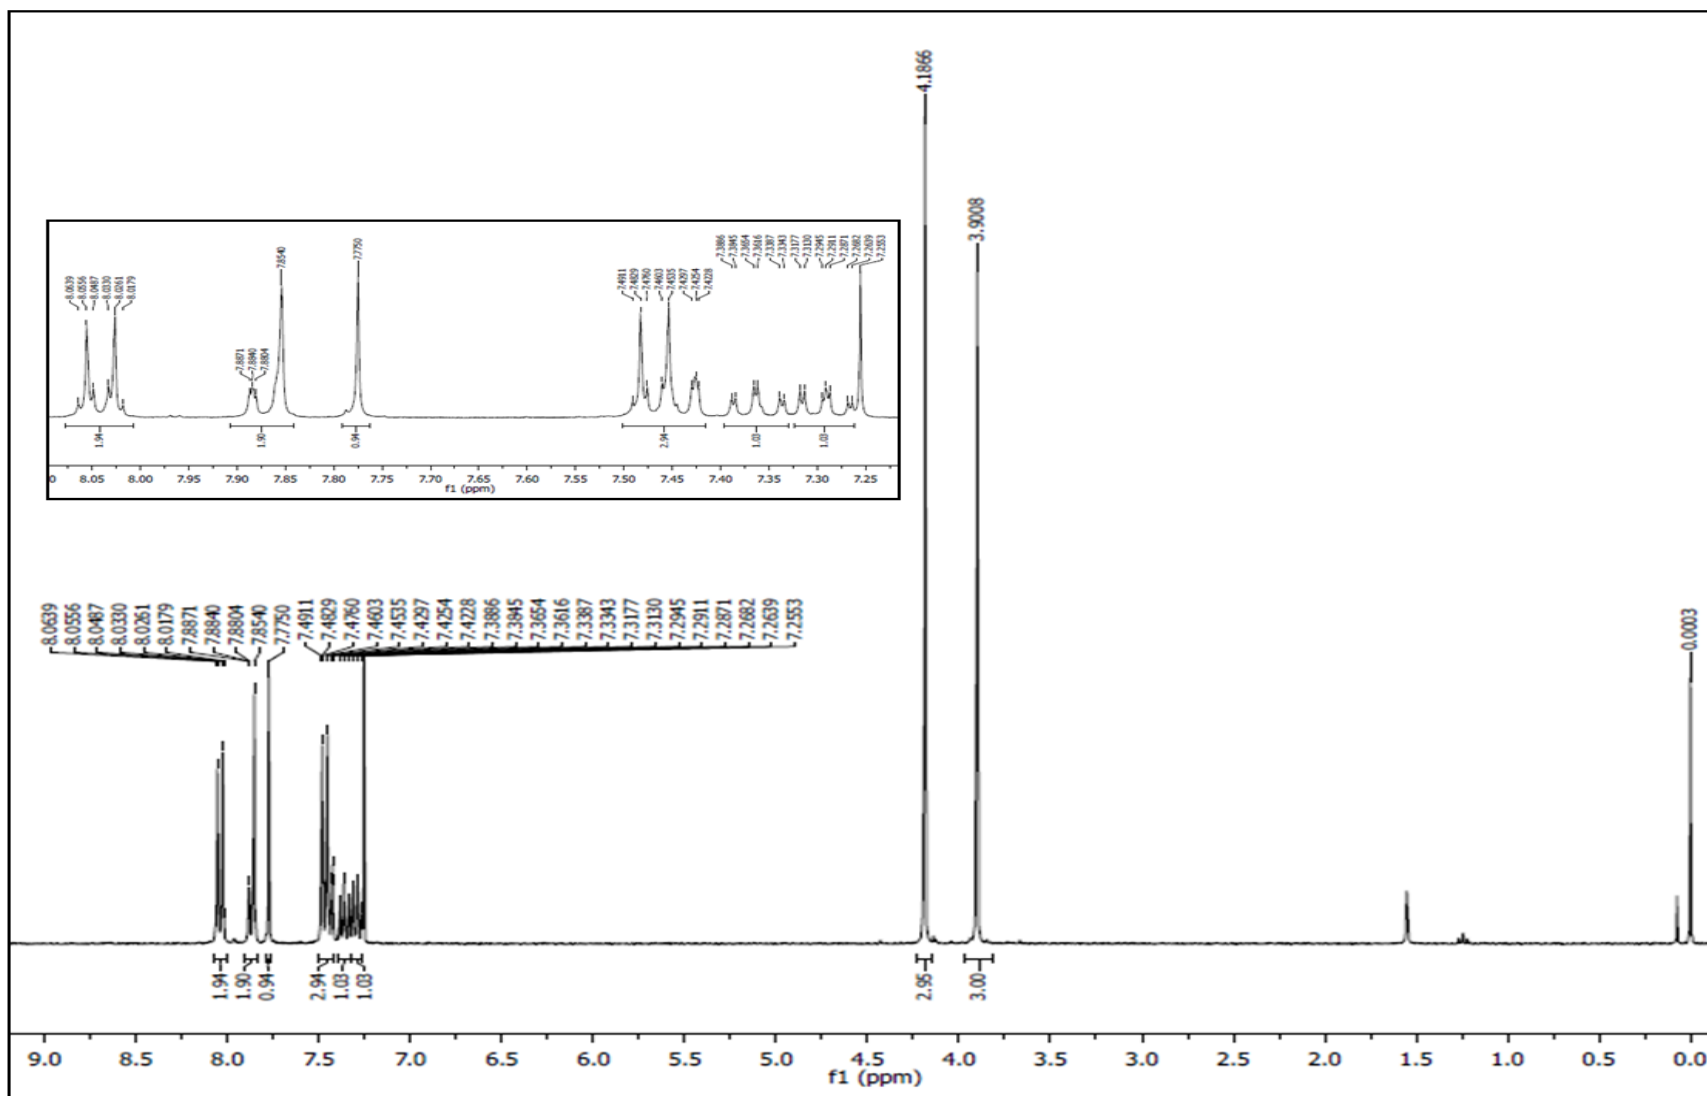

**Fig. S5.**  $^1\text{H}$ -NMR spectrum of compound **4b** in  $\text{CDCl}_3$ .



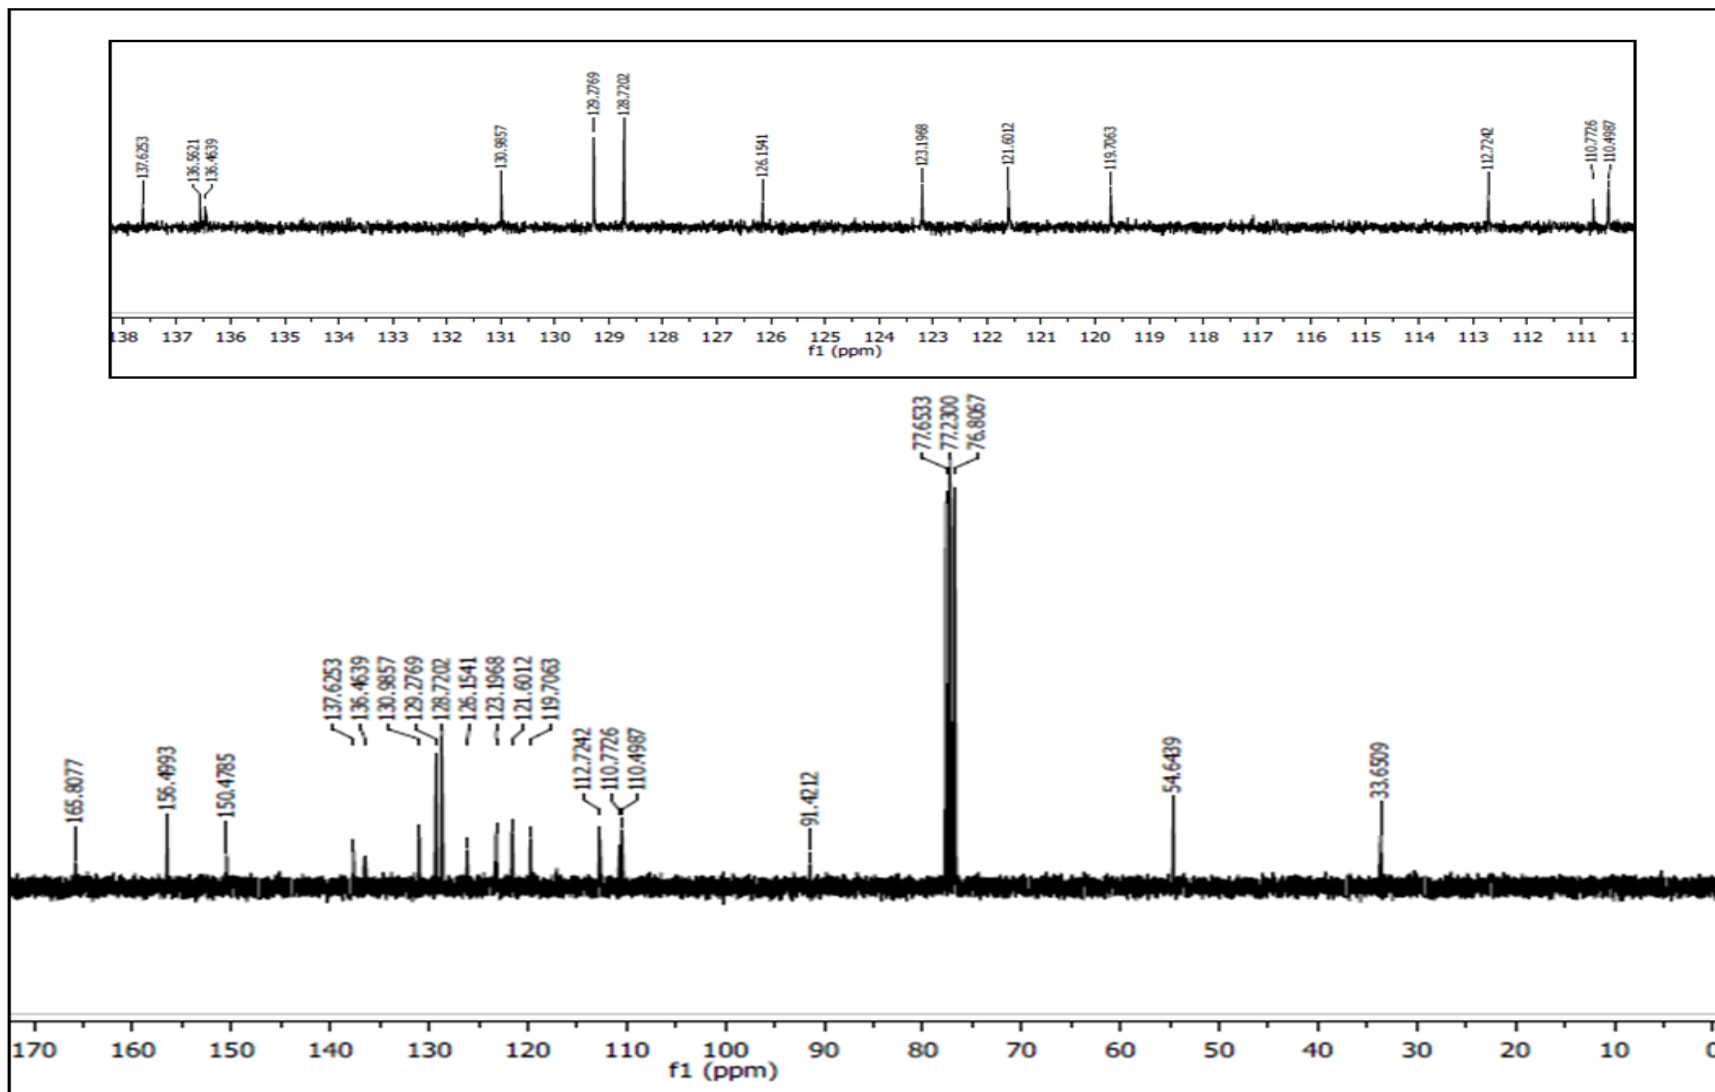

Fig. S6.  $^{13}\text{C}$ -NMR spectrum of compound **4b** in  $\text{CDCl}_3$ .

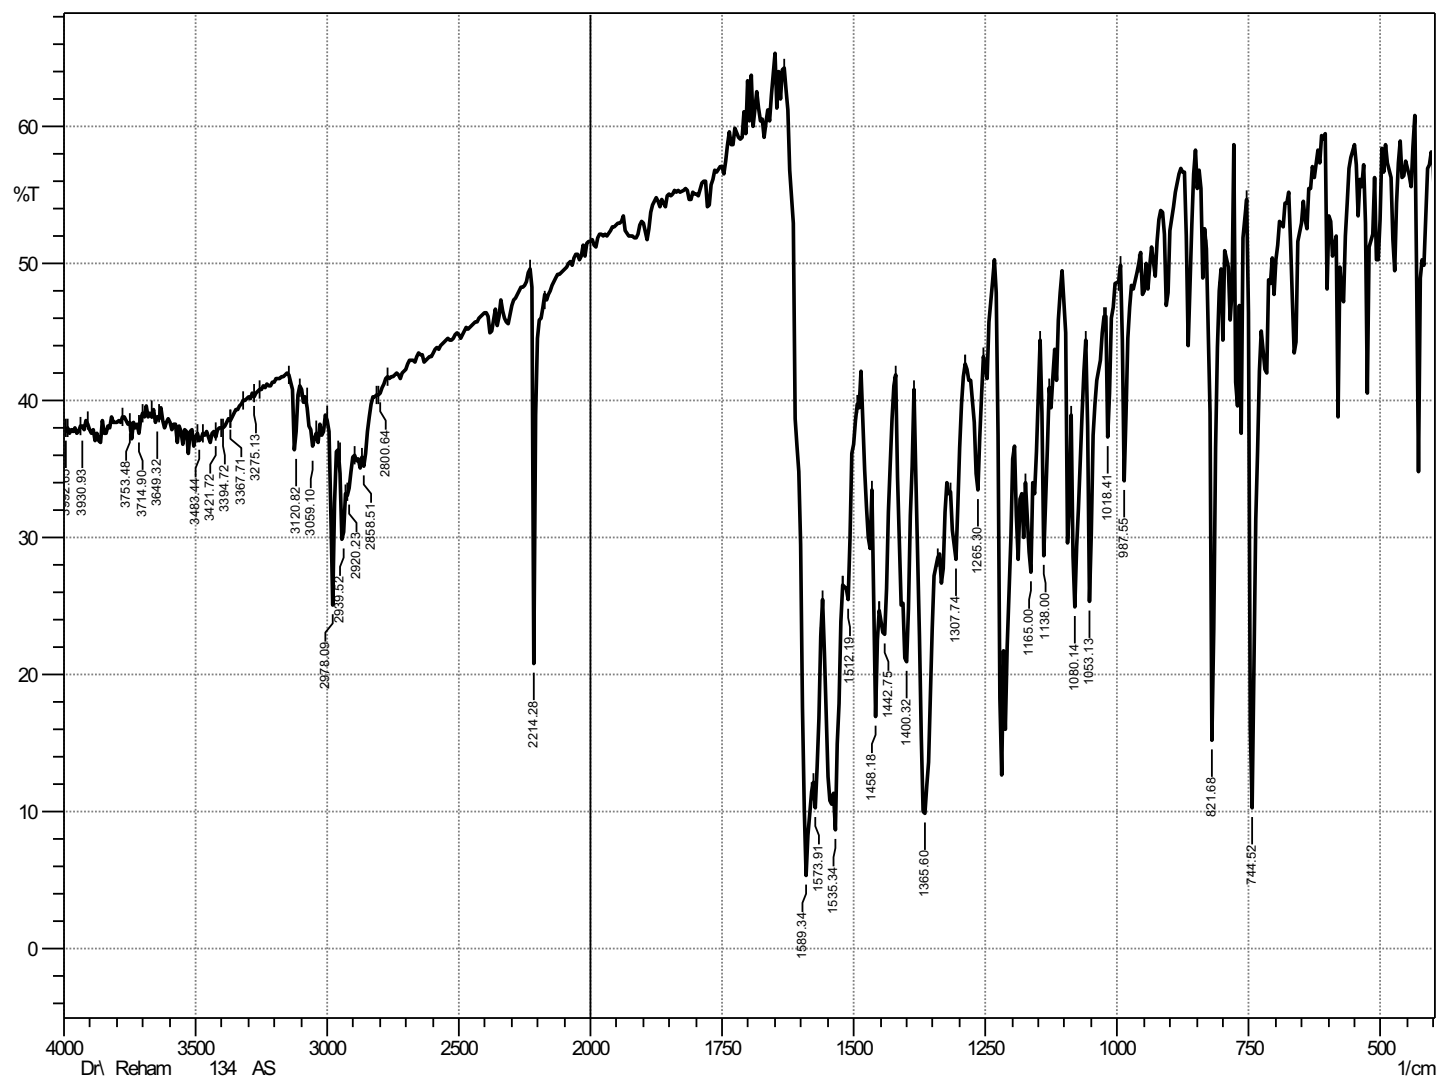

Fig. S7. IR spectrum of compound 4c (KBr pellet).

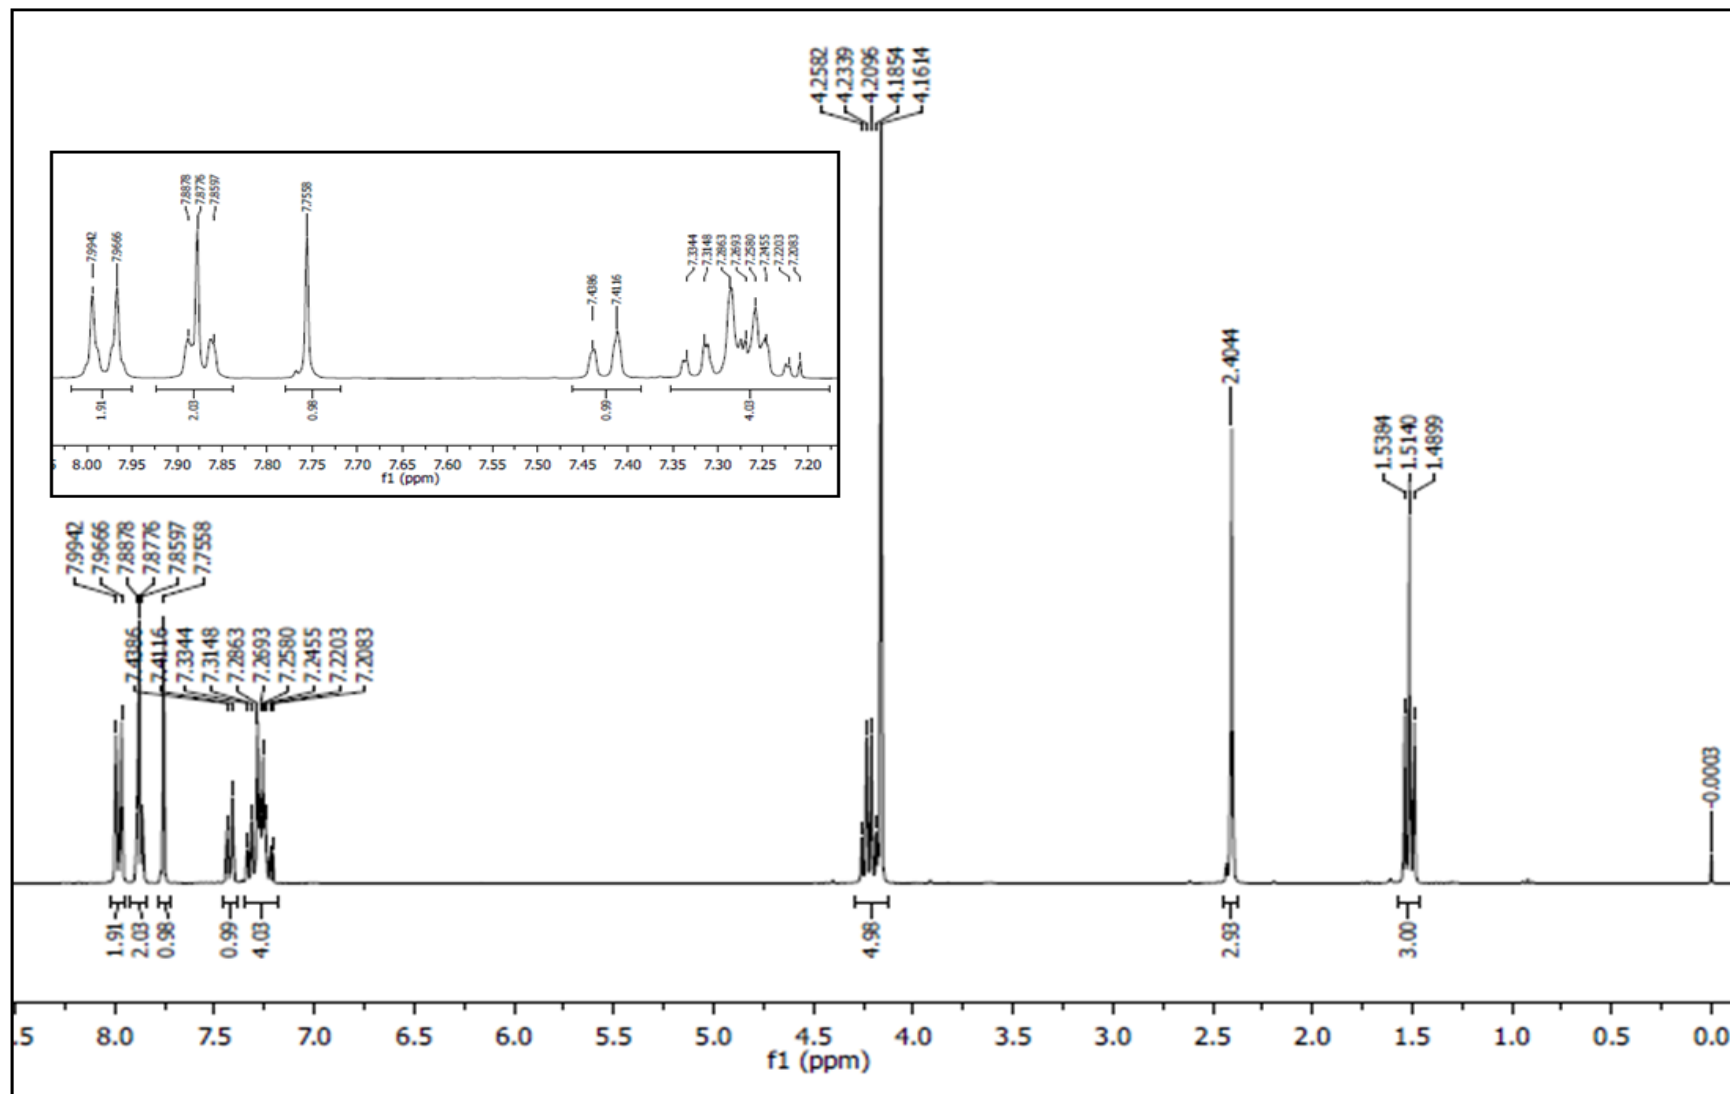

Fig. S8.  $^1\text{H}$ -NMR spectrum of compound **4c** in  $\text{CDCl}_3$ .

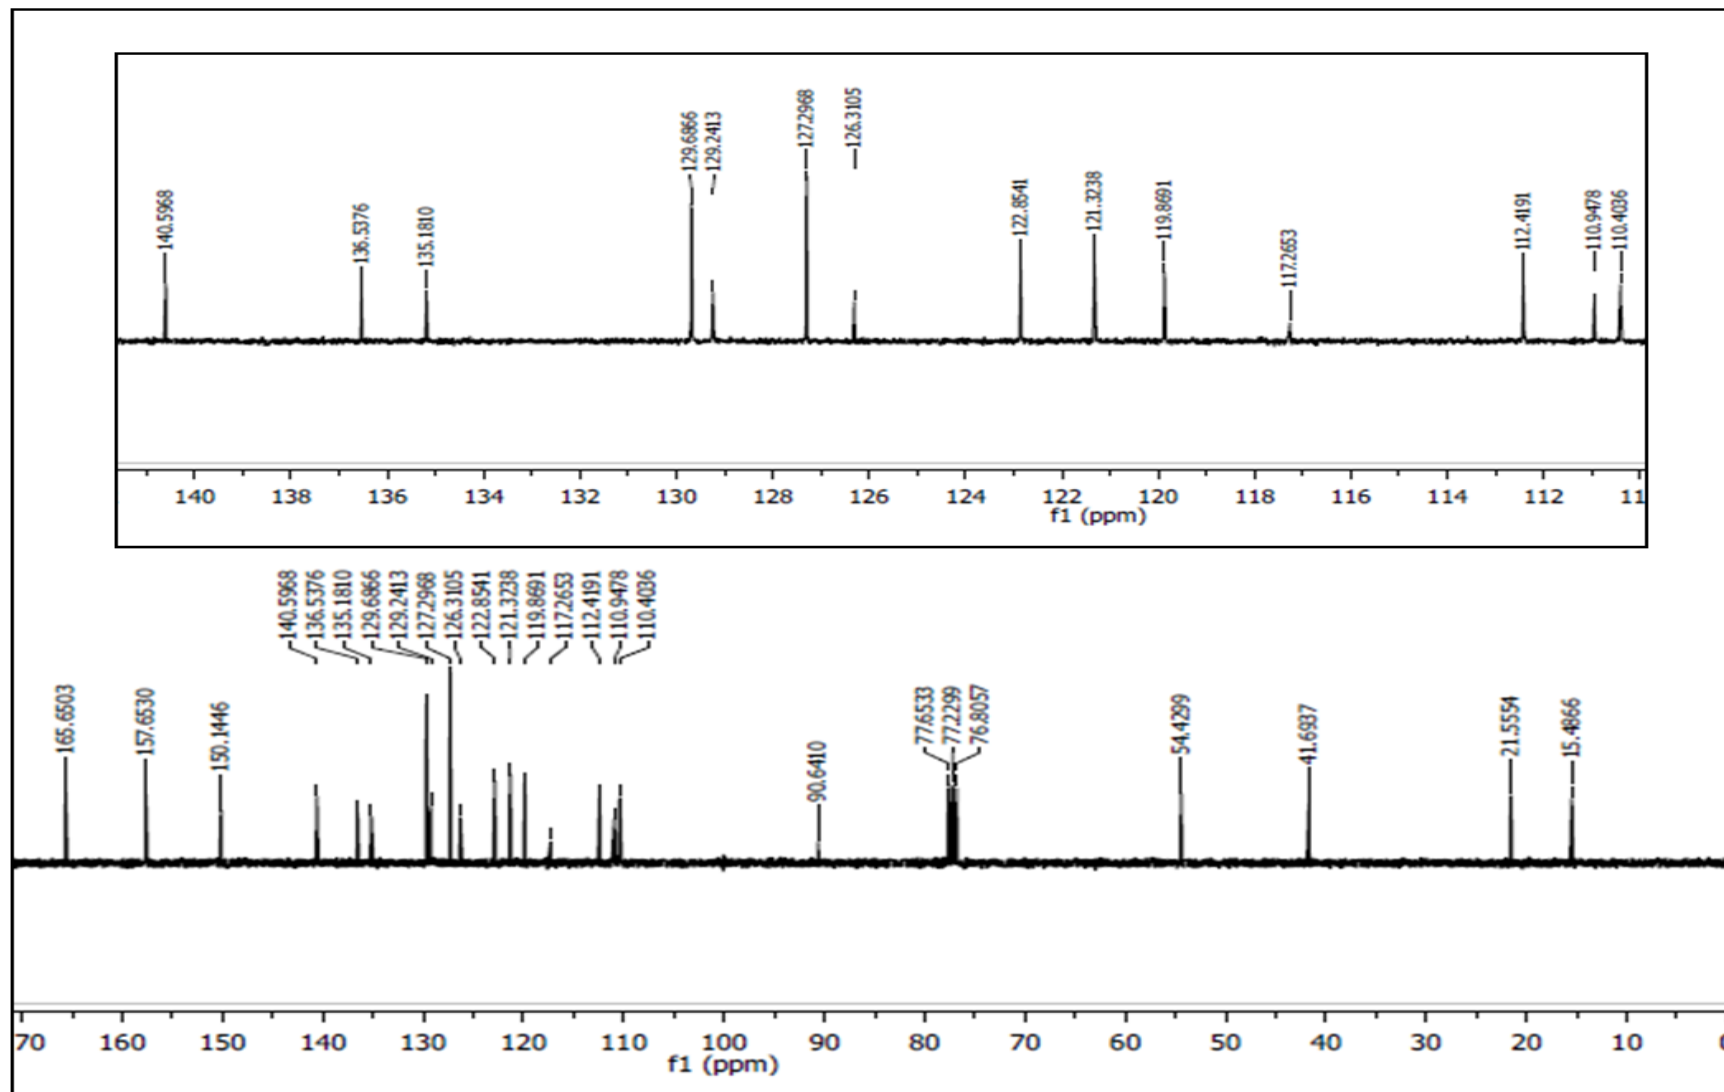

**Fig. S9.**  $^{13}\text{C}$ -NMR spectrum of compound **4c** in  $\text{CDCl}_3$ .

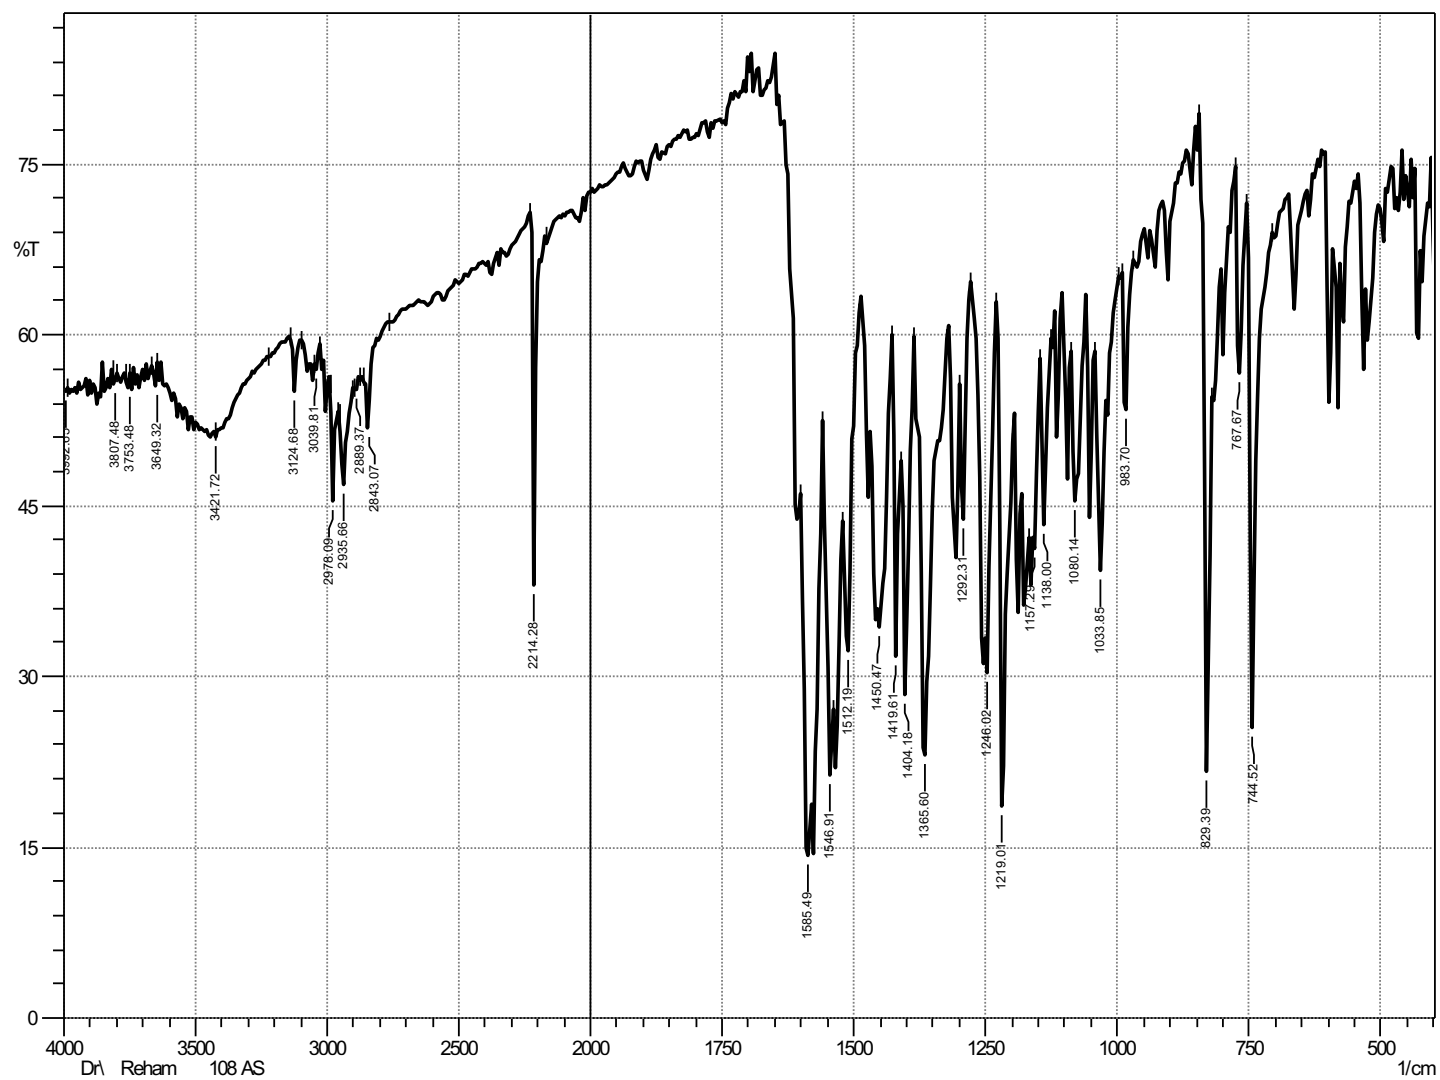

**Fig. S10.** IR spectrum of compound **4d** (KBr pellet).

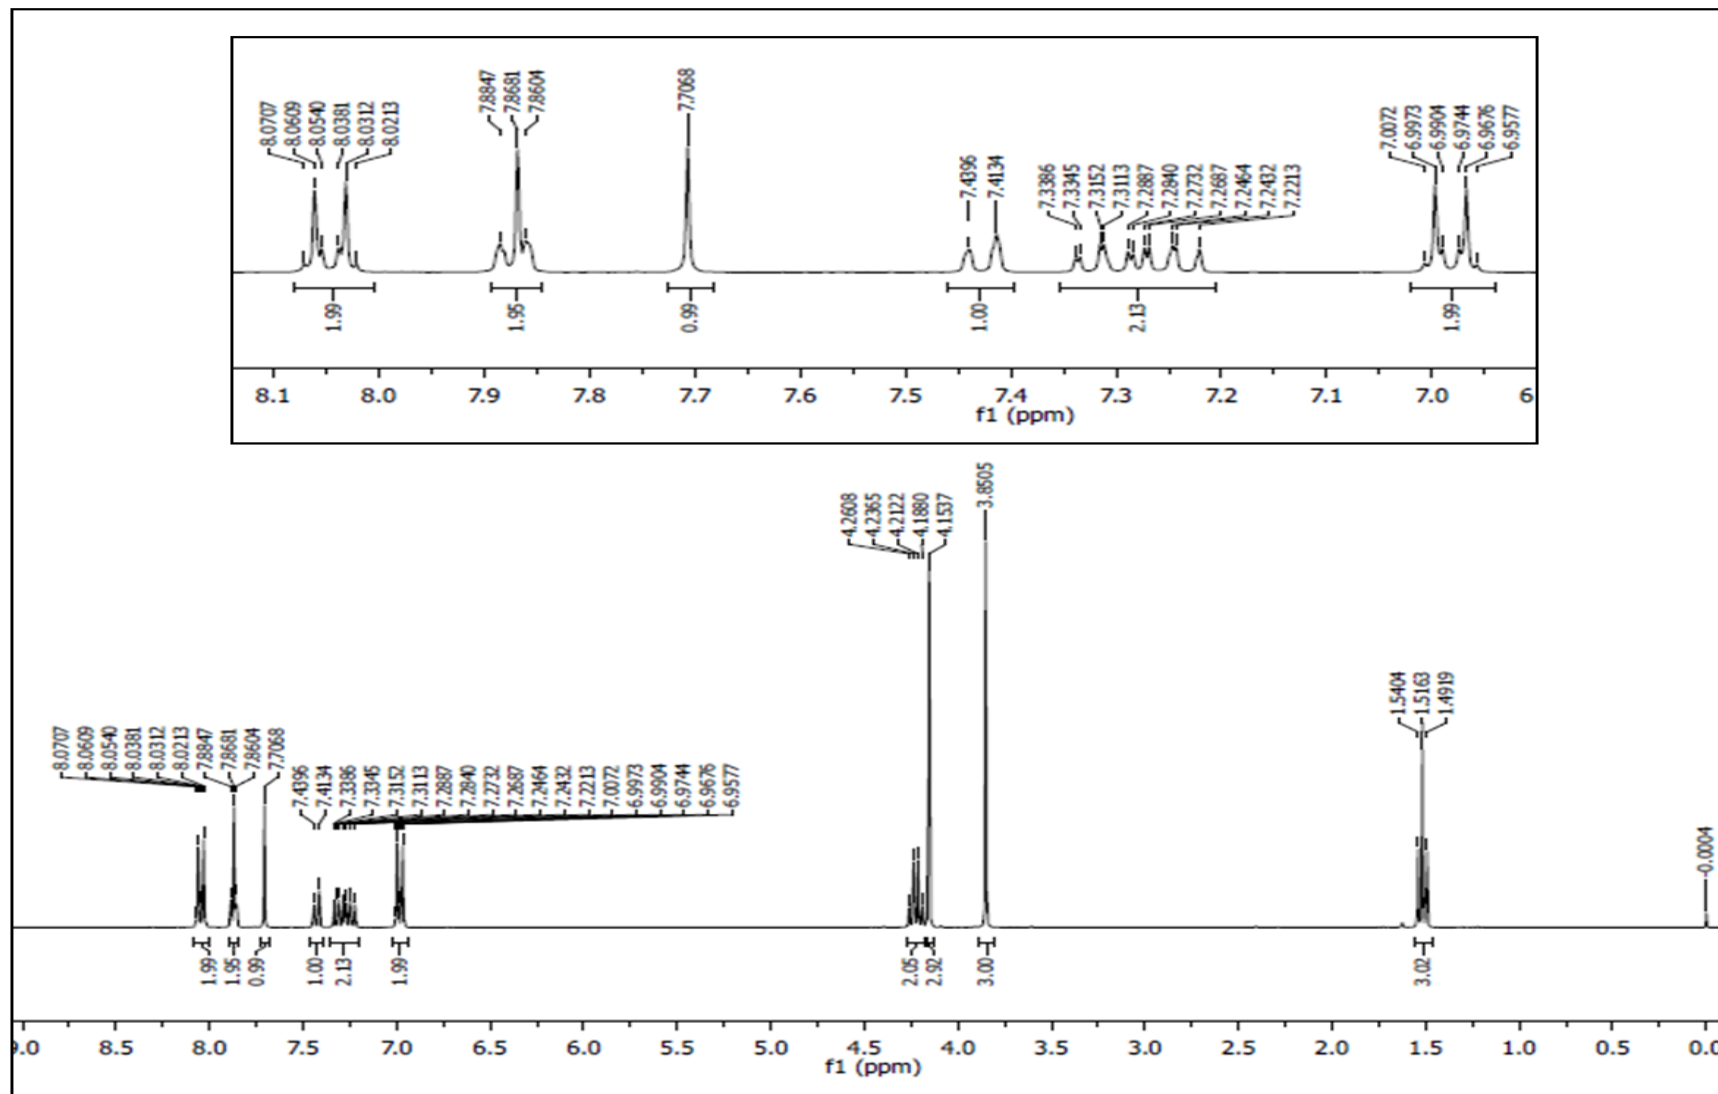

Fig. S11.  $^1\text{H}$ -NMR spectrum of compound **4d** in  $\text{CDCl}_3$ .

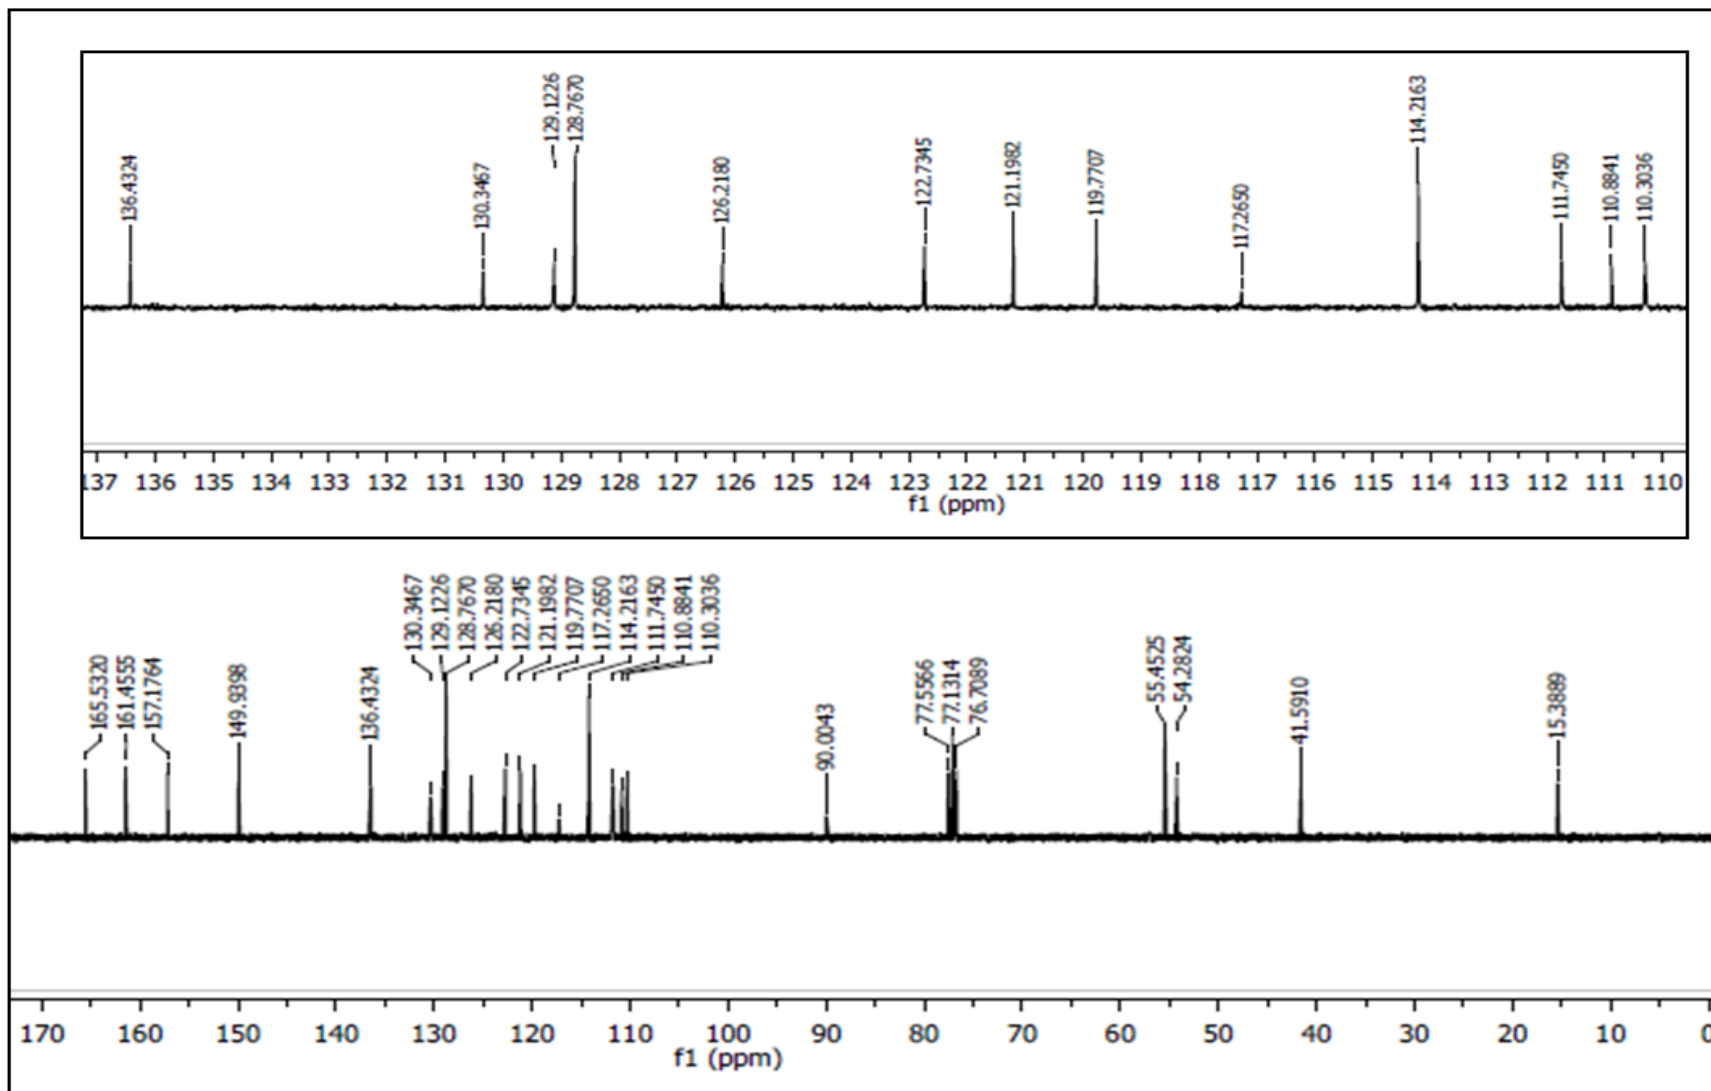

Fig. S12.  $^{13}\text{C}$ -NMR spectrum of compound **4d** in  $\text{CDCl}_3$ .

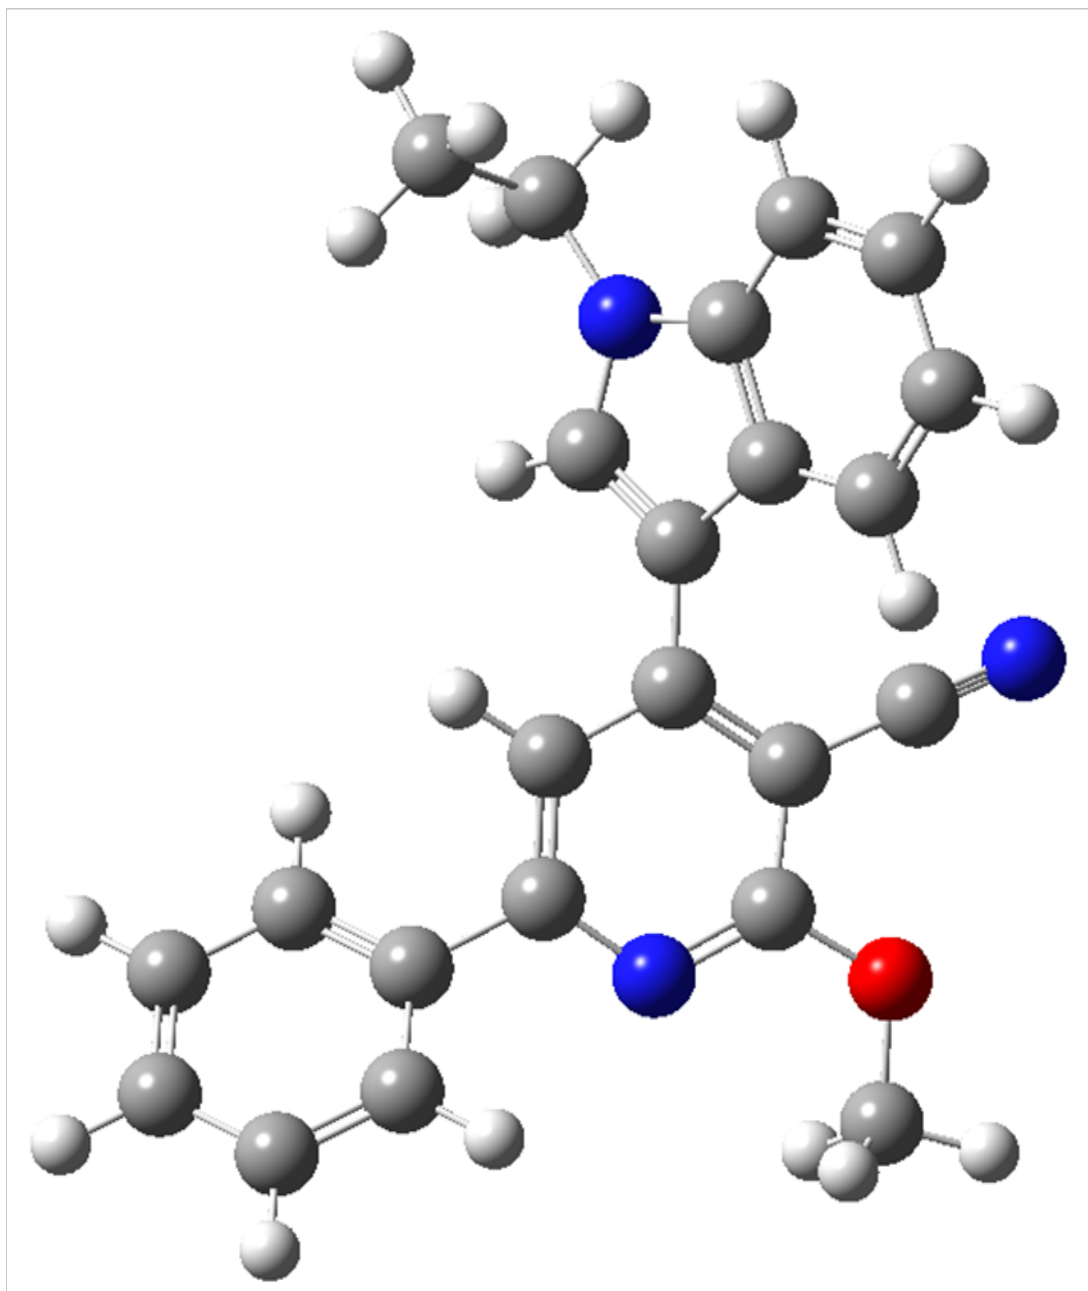

**Fig. S13.** A projection of the optimized structure of compound **4a** by DFT/B3LYP method with 6-31G(d,p) basis set.



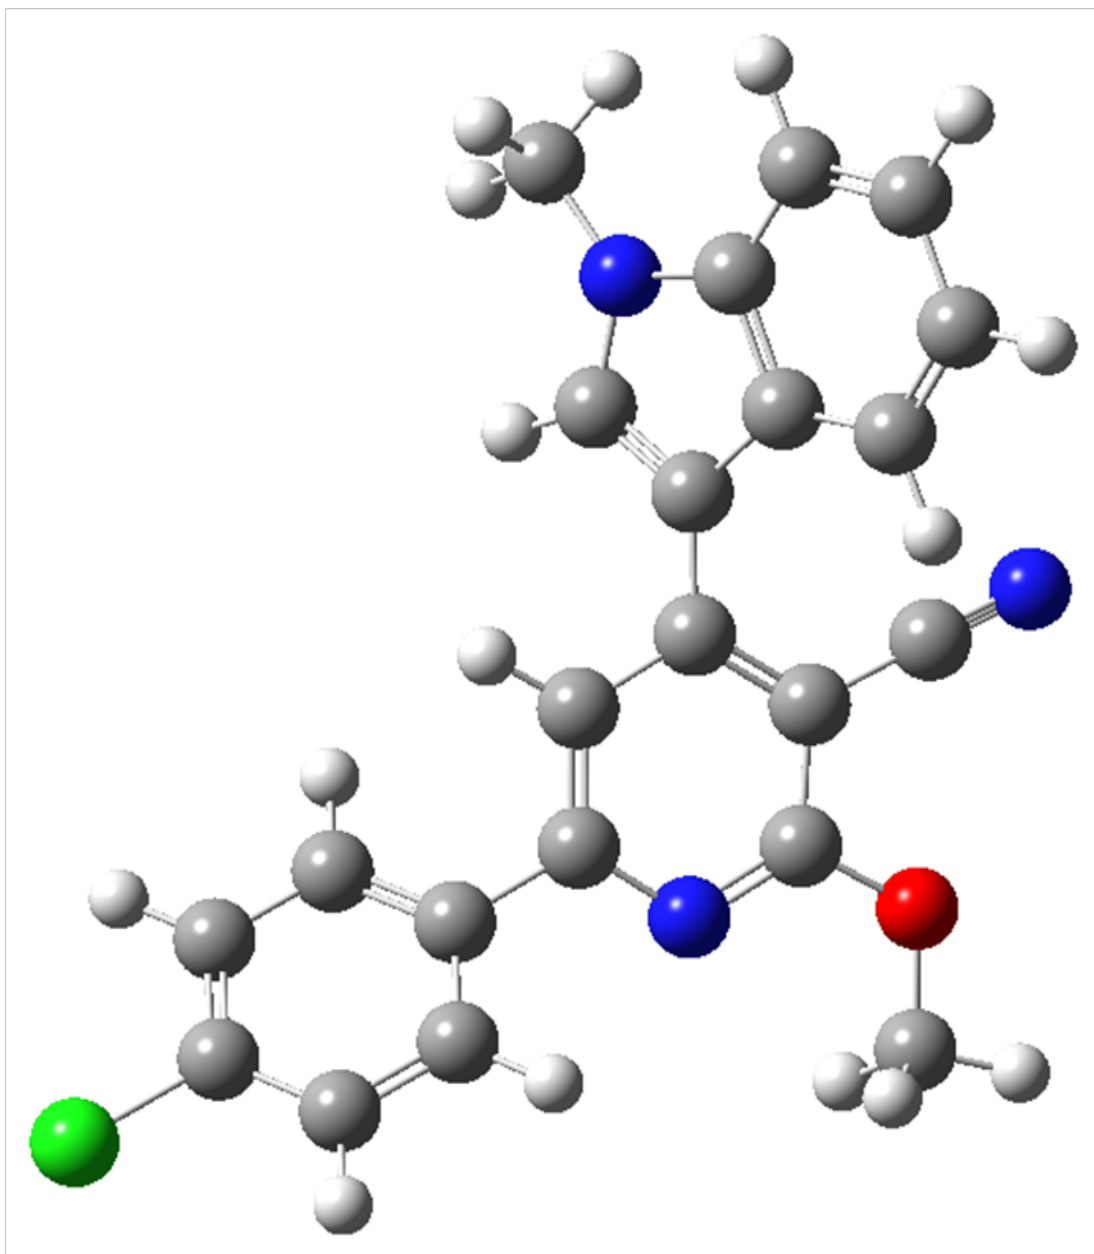

**Fig. S14.** A projection of the optimized structure of compound **4b** by DFT/B3LYP method with 6-31G(d,p) basis set.

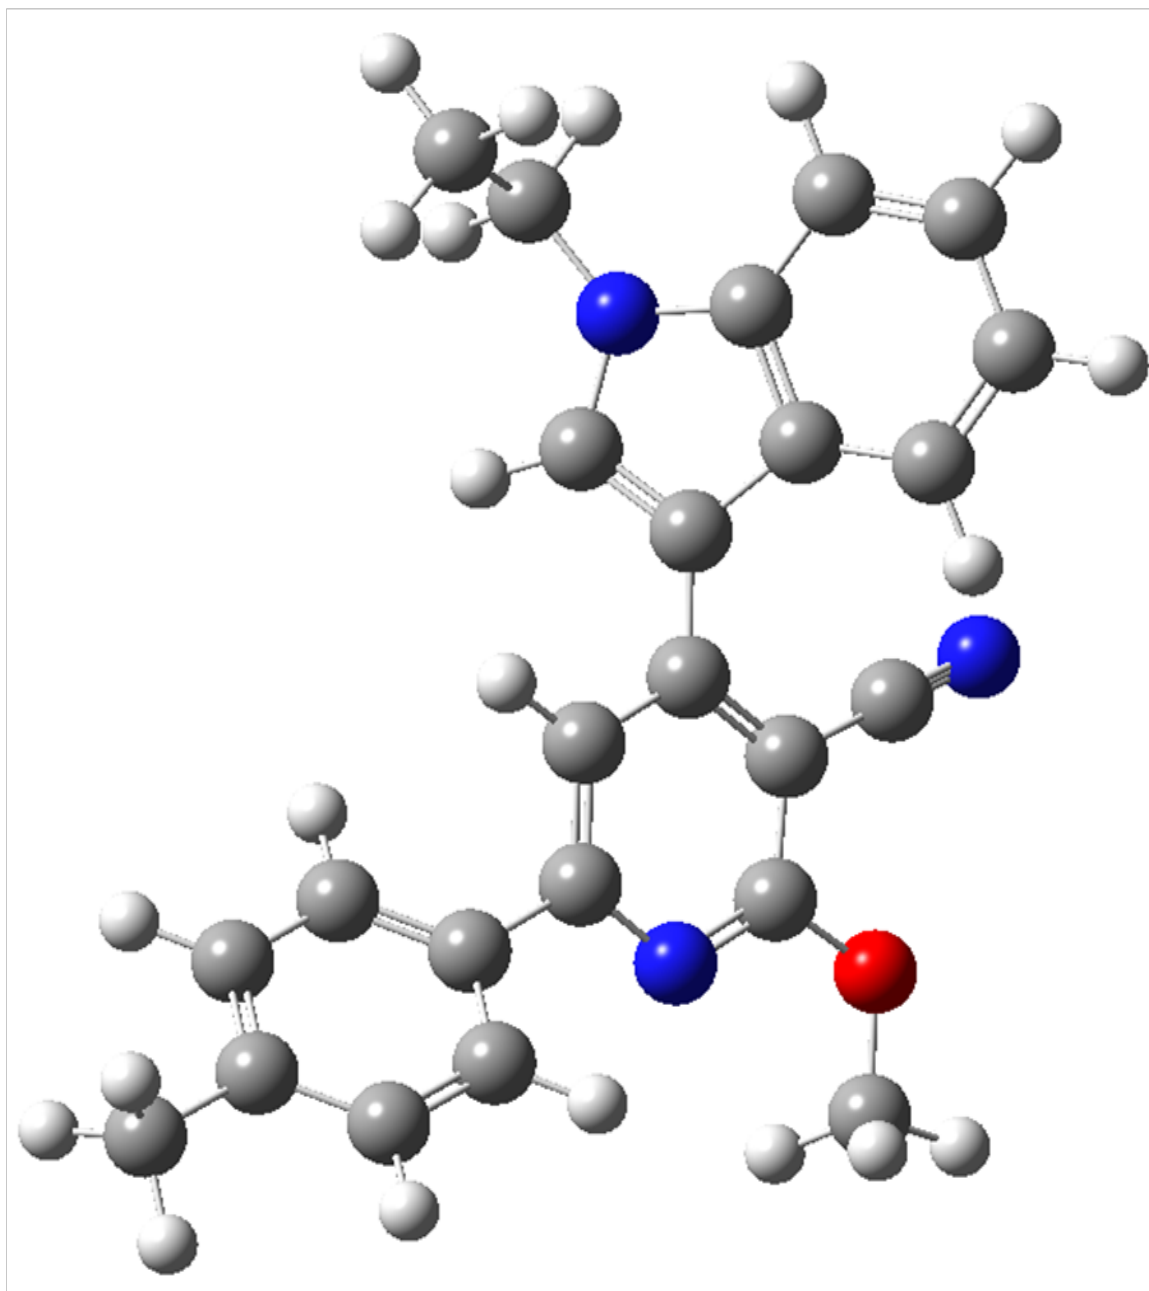

**Fig. S15.** A projection of the optimized structure of compound **4c** by DFT/B3LYP method with 6-31G(d,p) basis set.

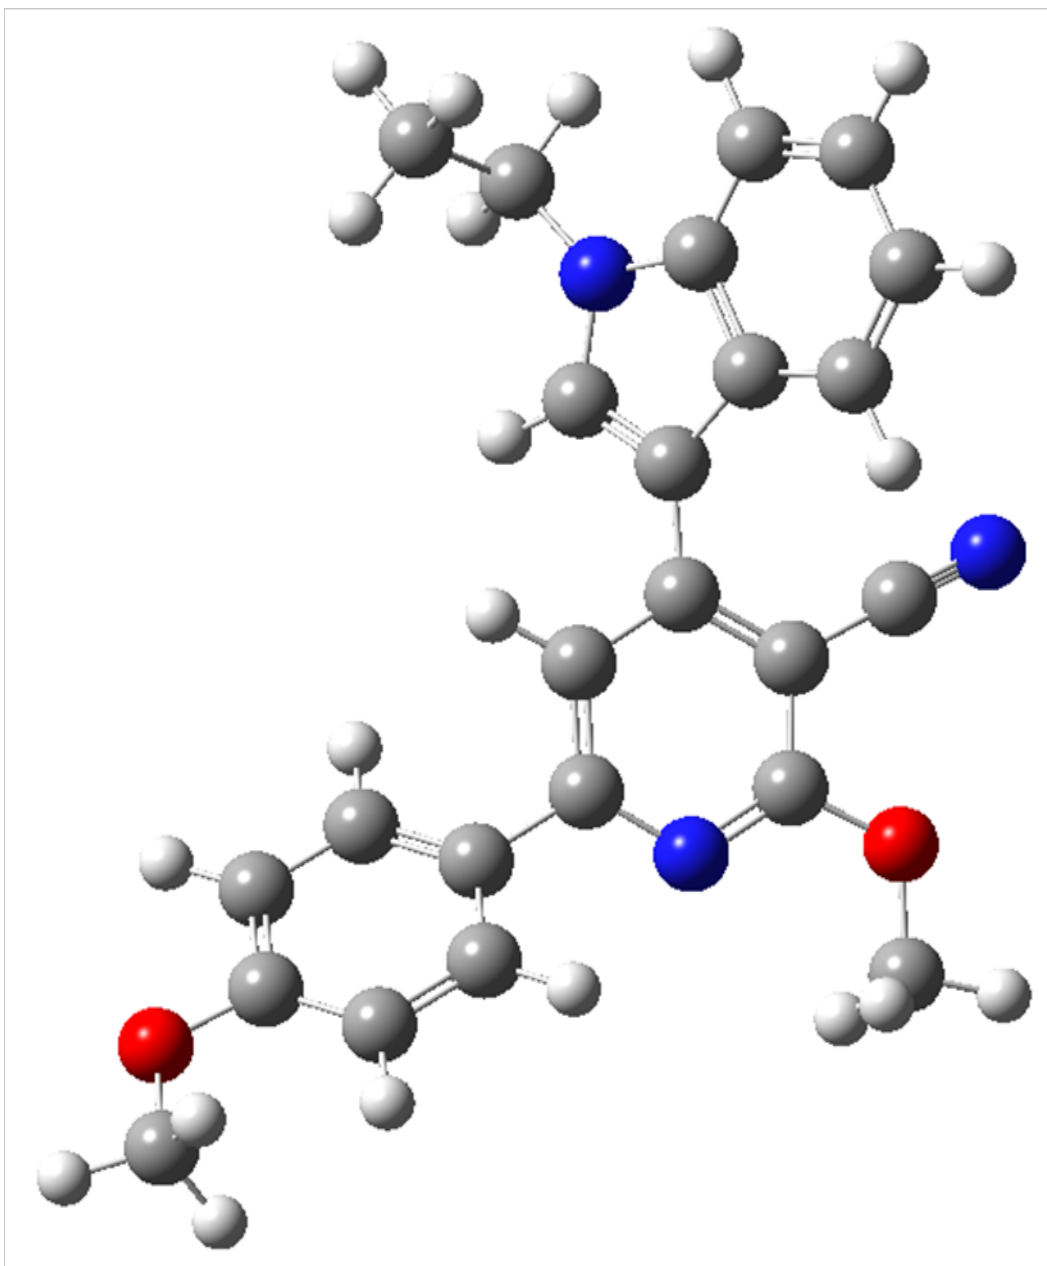

**Fig. S16.** A projection of the optimized structure of compound **4d** by DFT/B3LYP method with 6-31G(d,p) basis set.

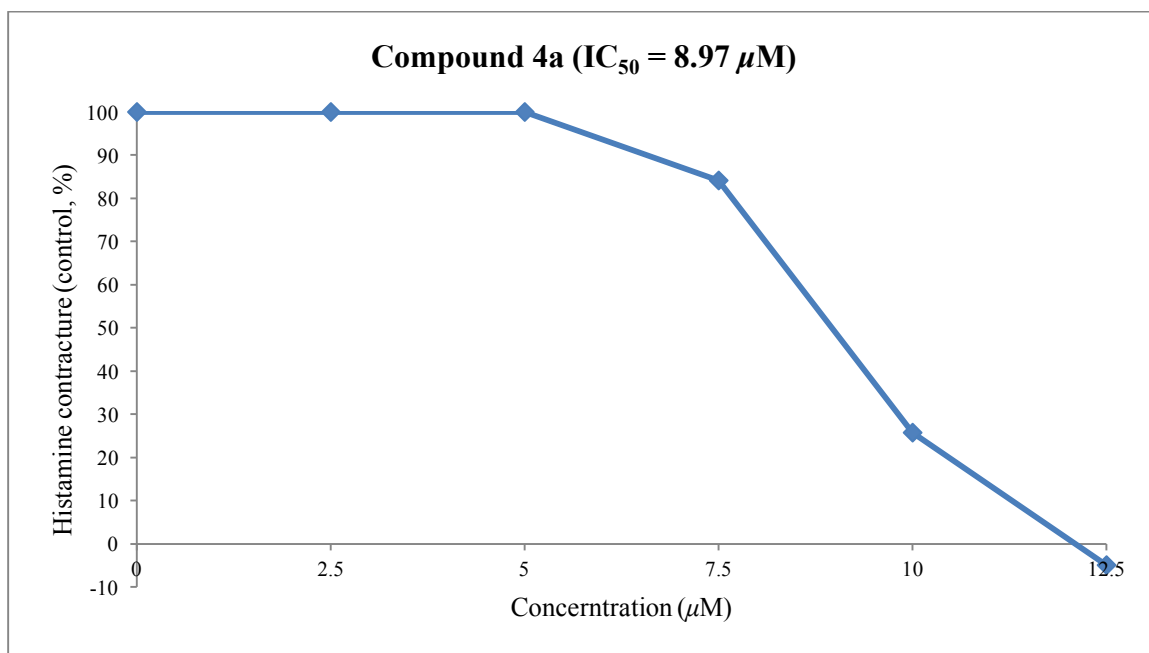

**Fig. S17.** Effect of compound **4a** on contracture induced by histamine in isolated guinea pig tracheal rings.

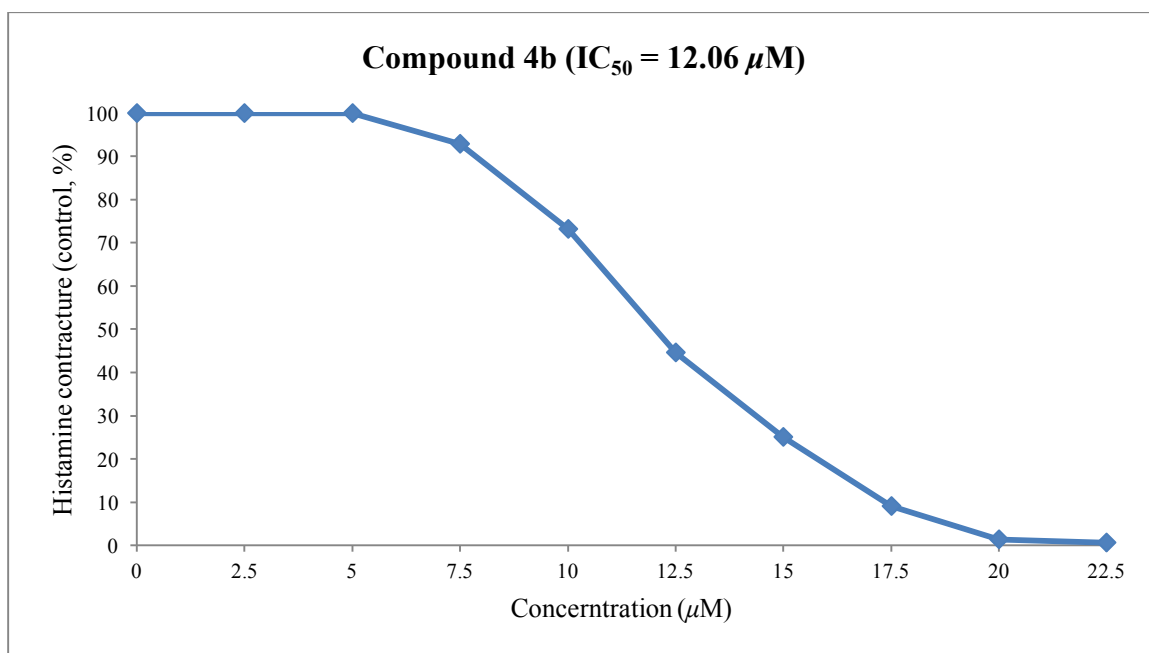

**Fig. S18.** Effect of compound **4b** on contracture induced by histamine in isolated guinea pig tracheal rings.

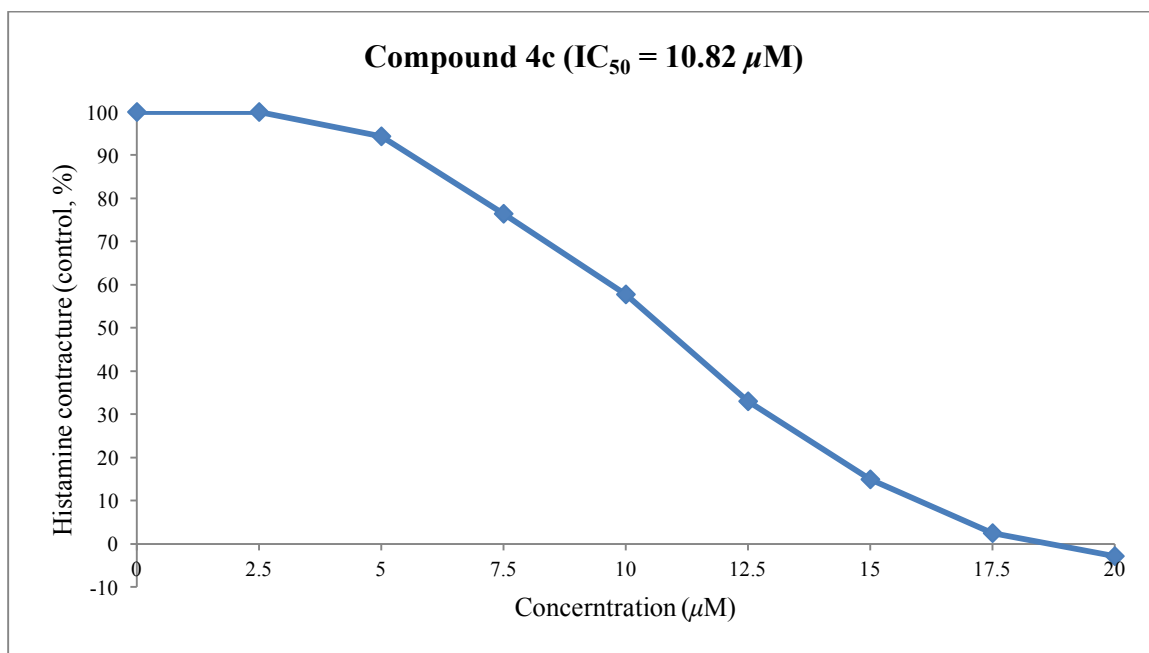

**Fig. S19.** Effect of compound **4c** on contracture induced by histamine in isolated guinea pig tracheal rings.

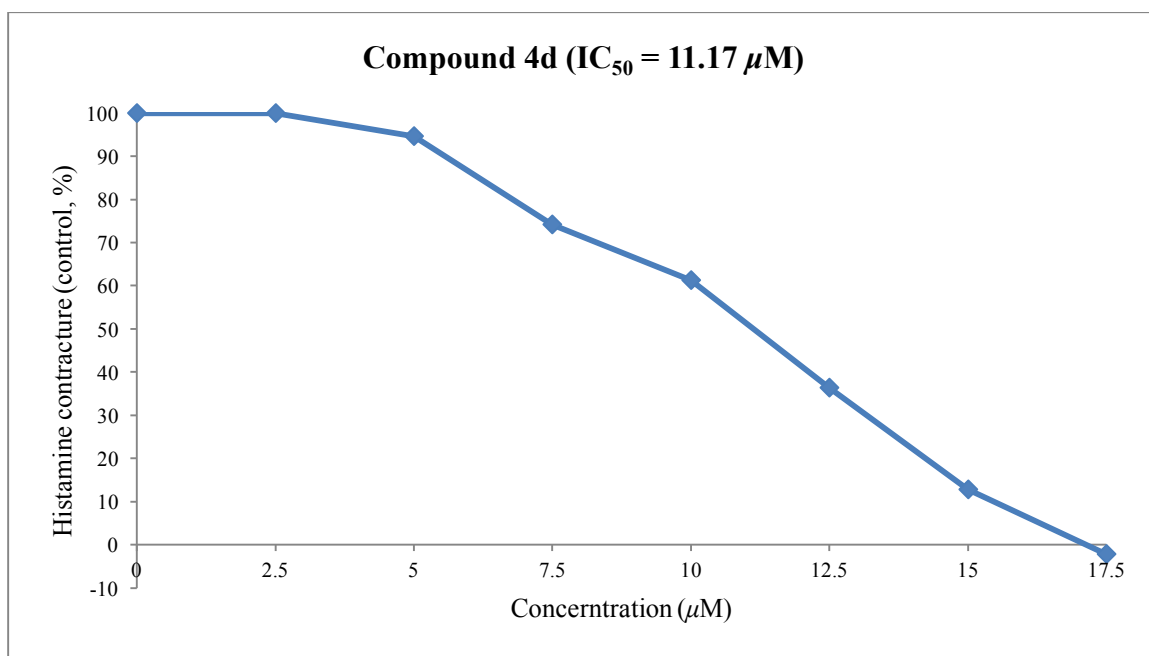

**Fig. S20.** Effect of compound **4d** on contracture induced by histamine in isolated guinea pig tracheal rings.

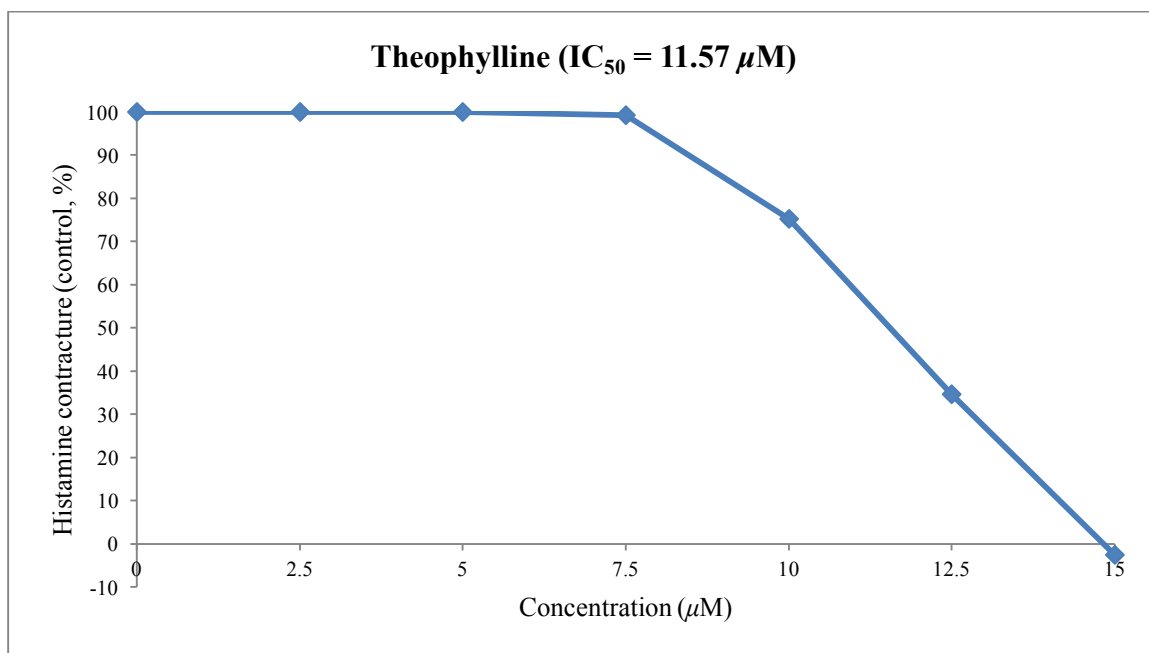

**Fig. S21.** Effect of theophylline on contracture induced by histamine in isolated guinea pig tracheal rings.

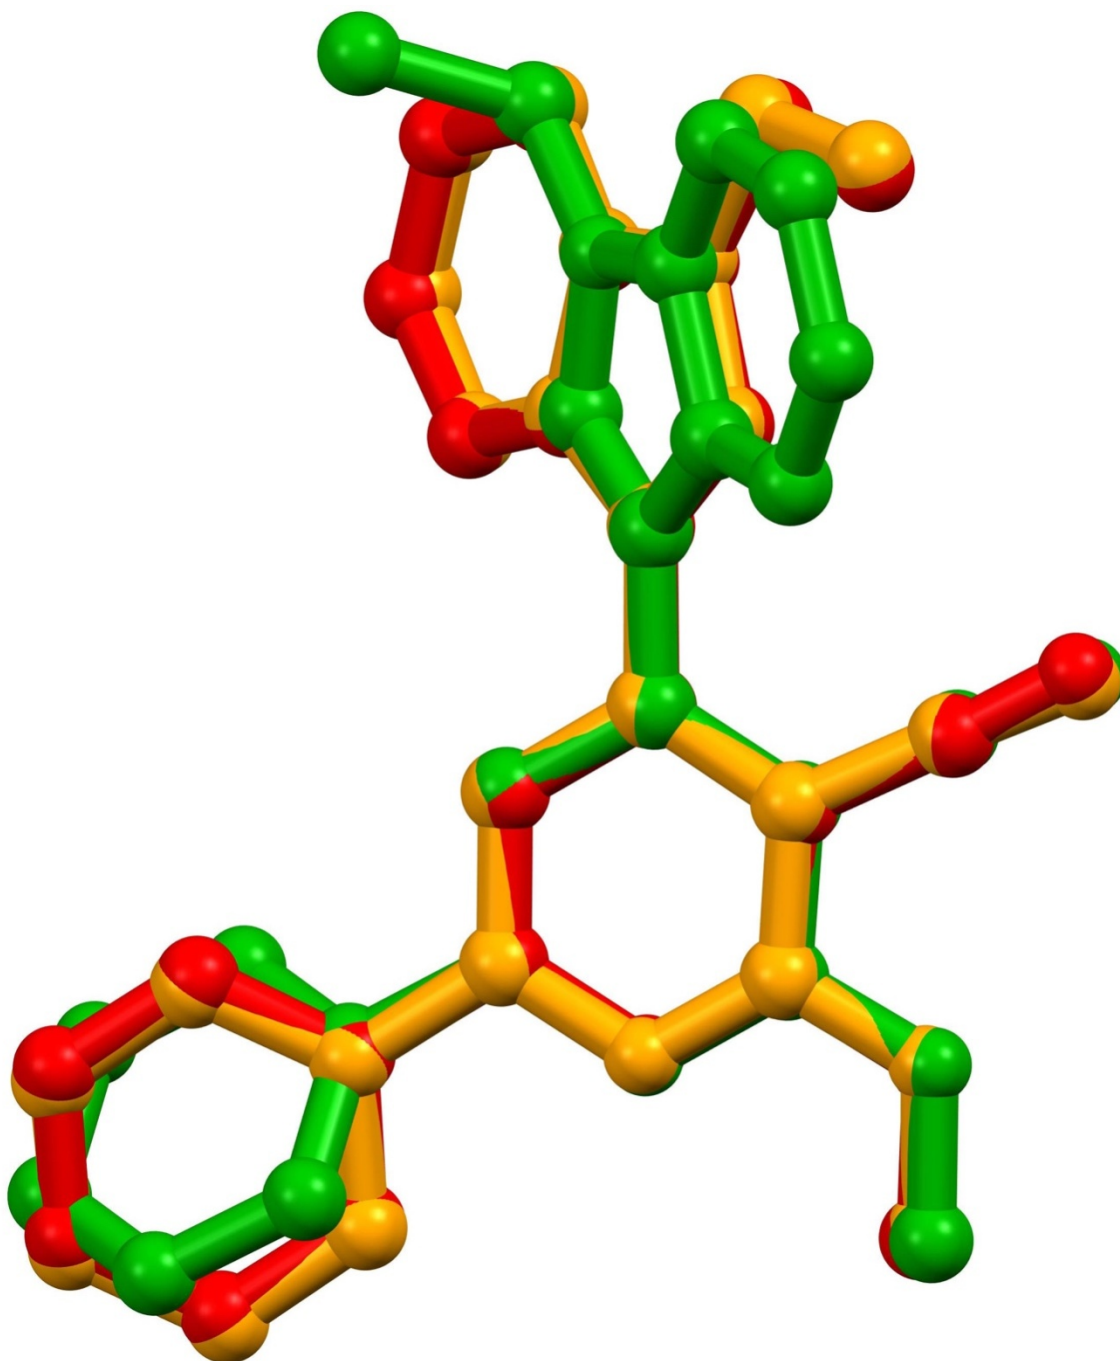

**Fig. S22.** Overlay view of compound **4a**, red (X-ray structure), green (free state DFT), yellow (DFT-d validation).

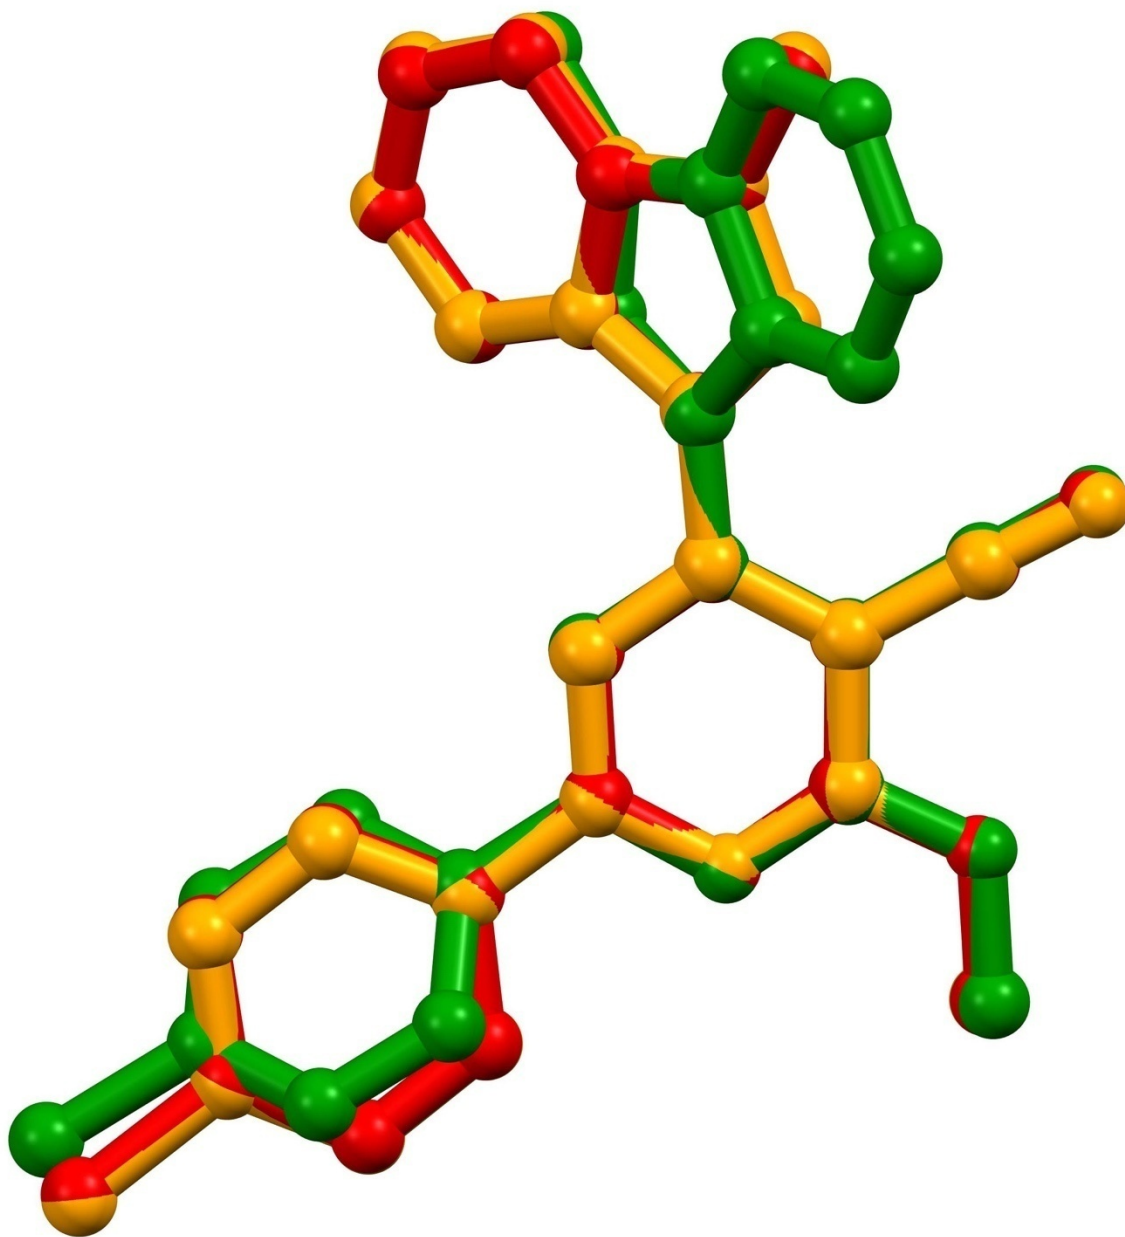

**Fig. S23.** Overlay view of compound **4b**, red (X-ray structure), green (free state DFT), yellow (DFT-d validation).



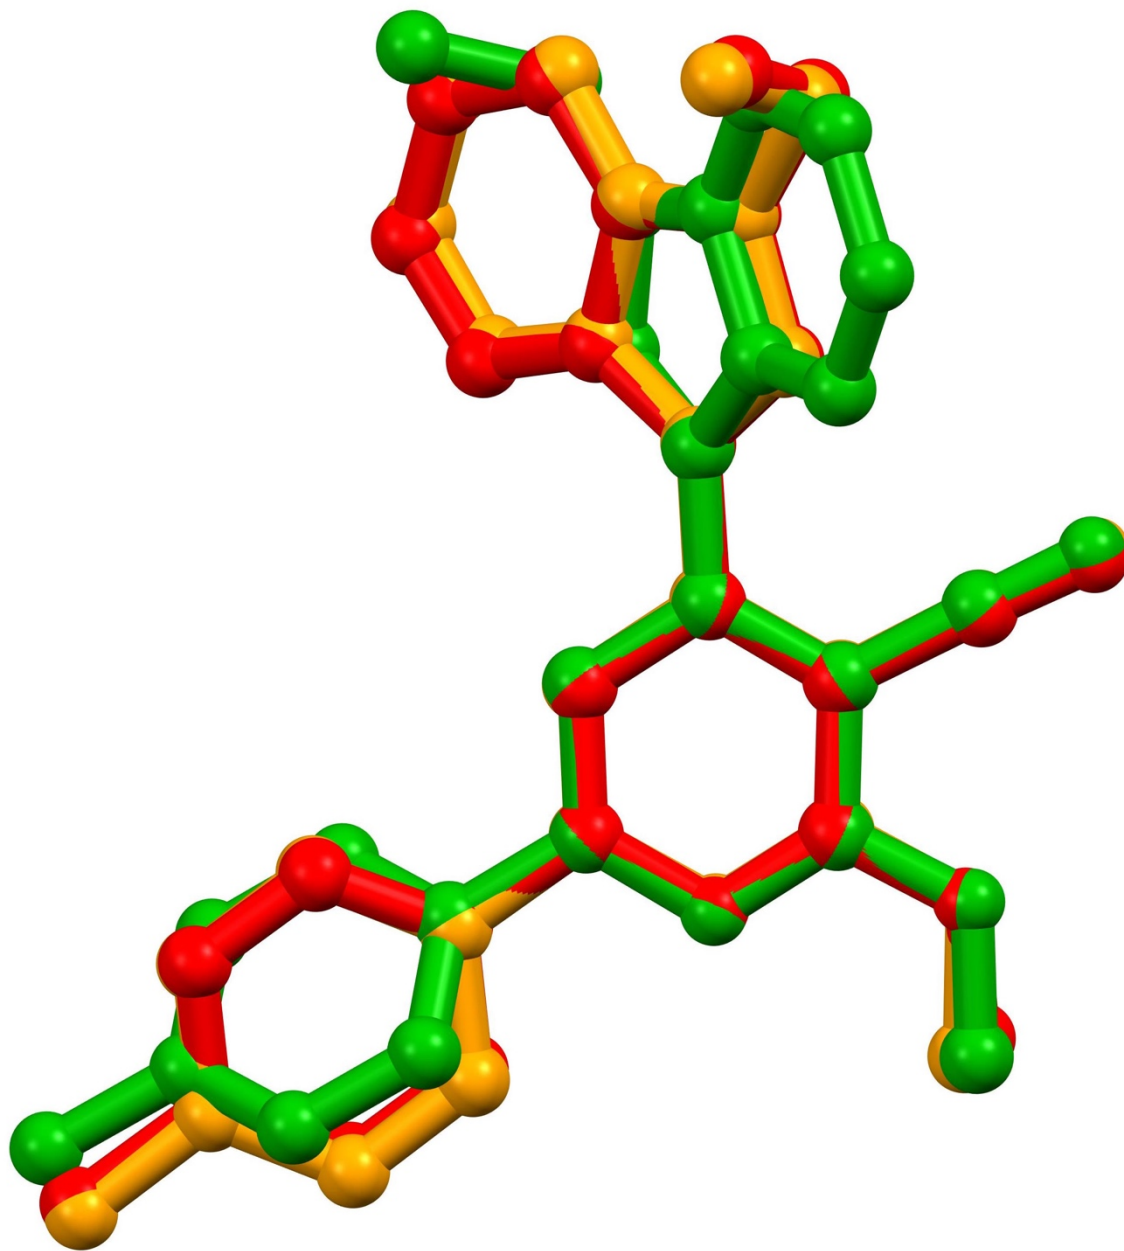

**Fig. S24.** Overlay view of compound **4c**, red (X-ray structure), green (free state DFT), yellow (DFT-d validation).

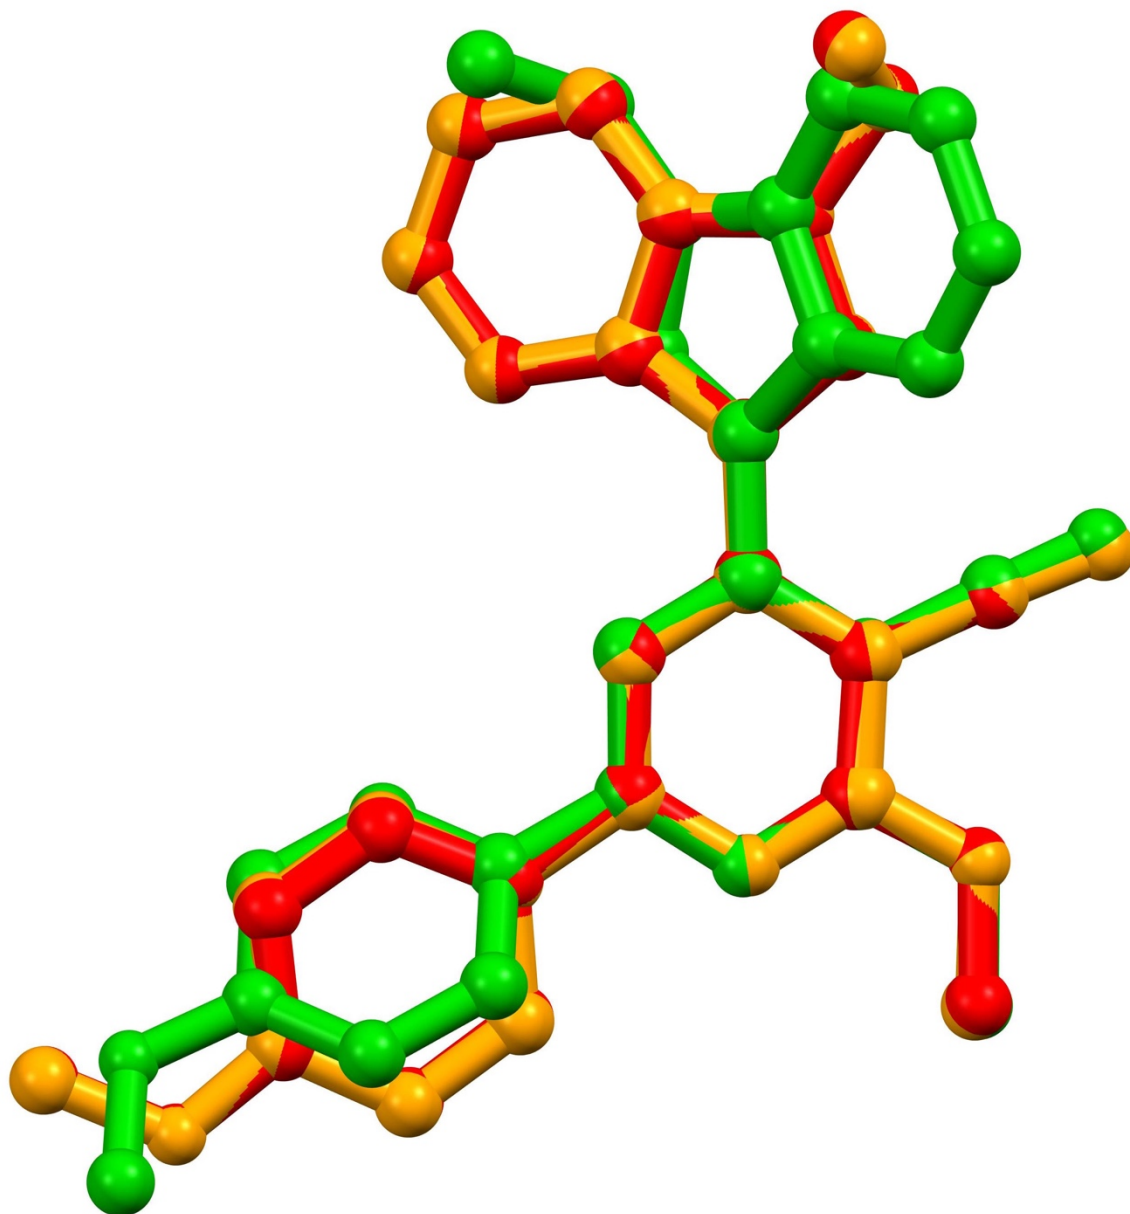

**Fig. S25.** Overlay view of compound **4d**, red (X-ray structure), green (free state DFT), yellow (DFT-d validation).

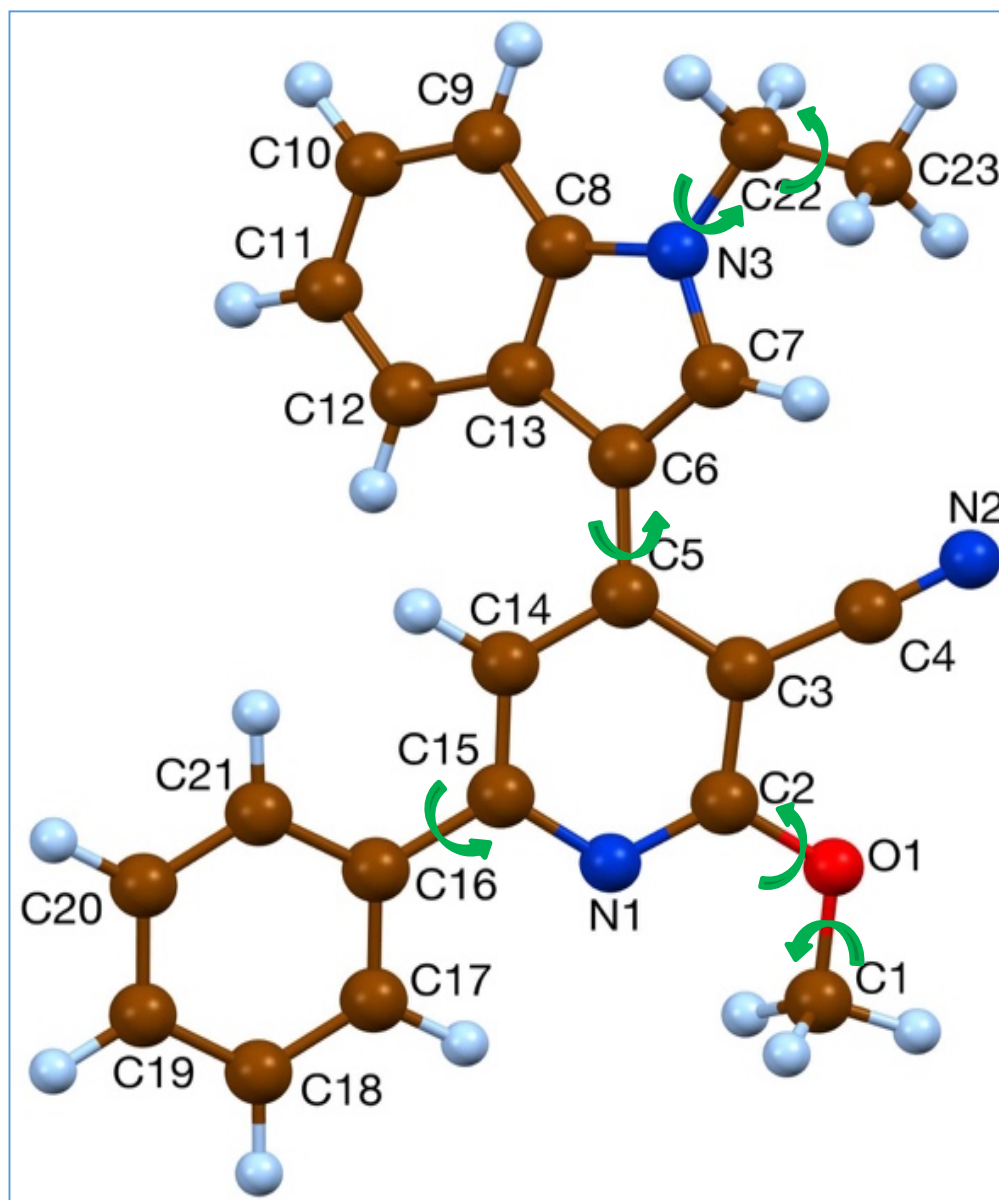

**Fig. S26.** The molecular structure of compound **4a** showing the atom-labeling scheme and the refined torsion angles (green arrows).

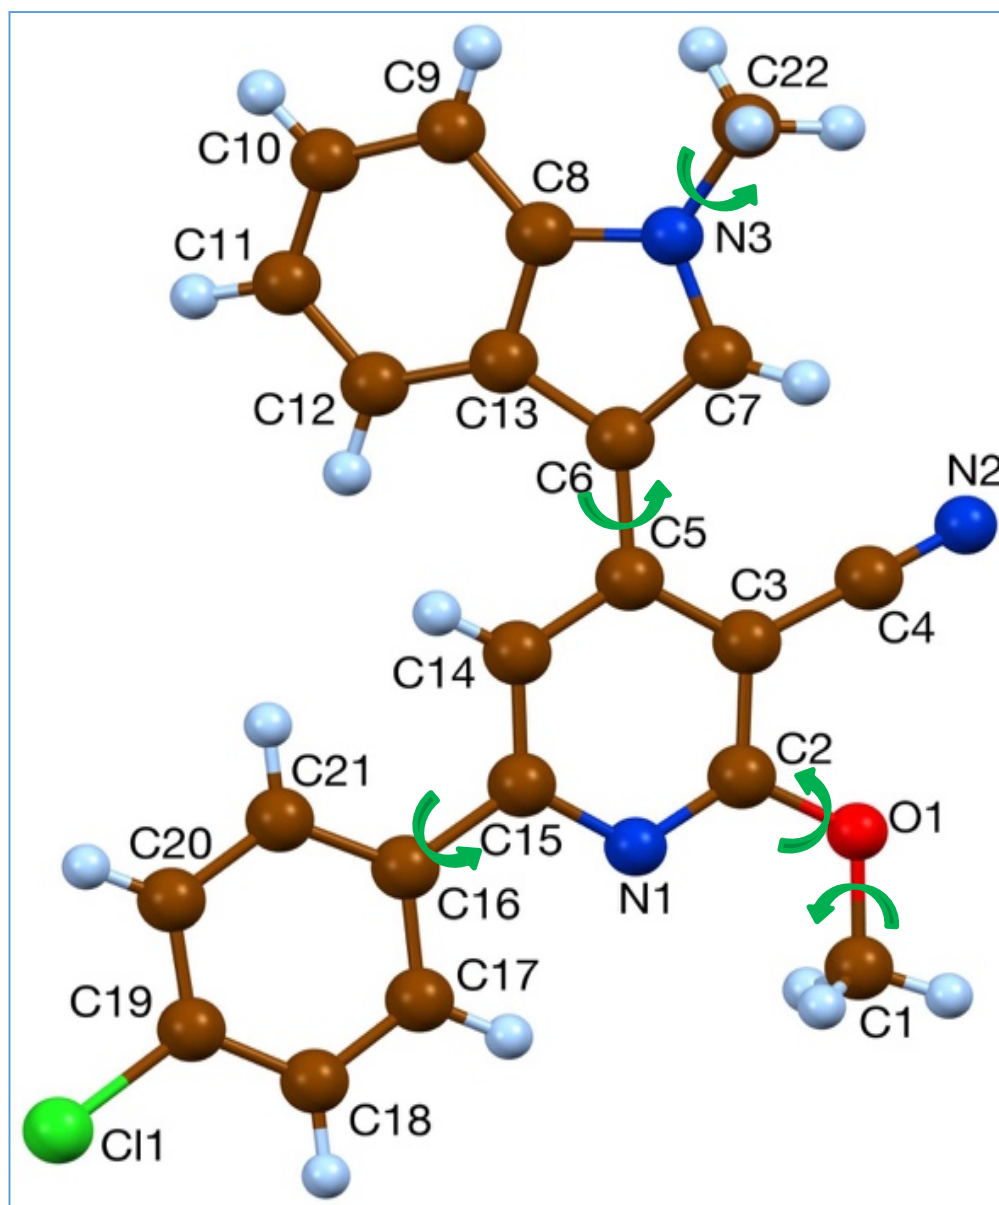

**Fig. S27.** The molecular structure of compound **4b** showing the atom-labeling scheme and the refined torsion angles (green arrows).

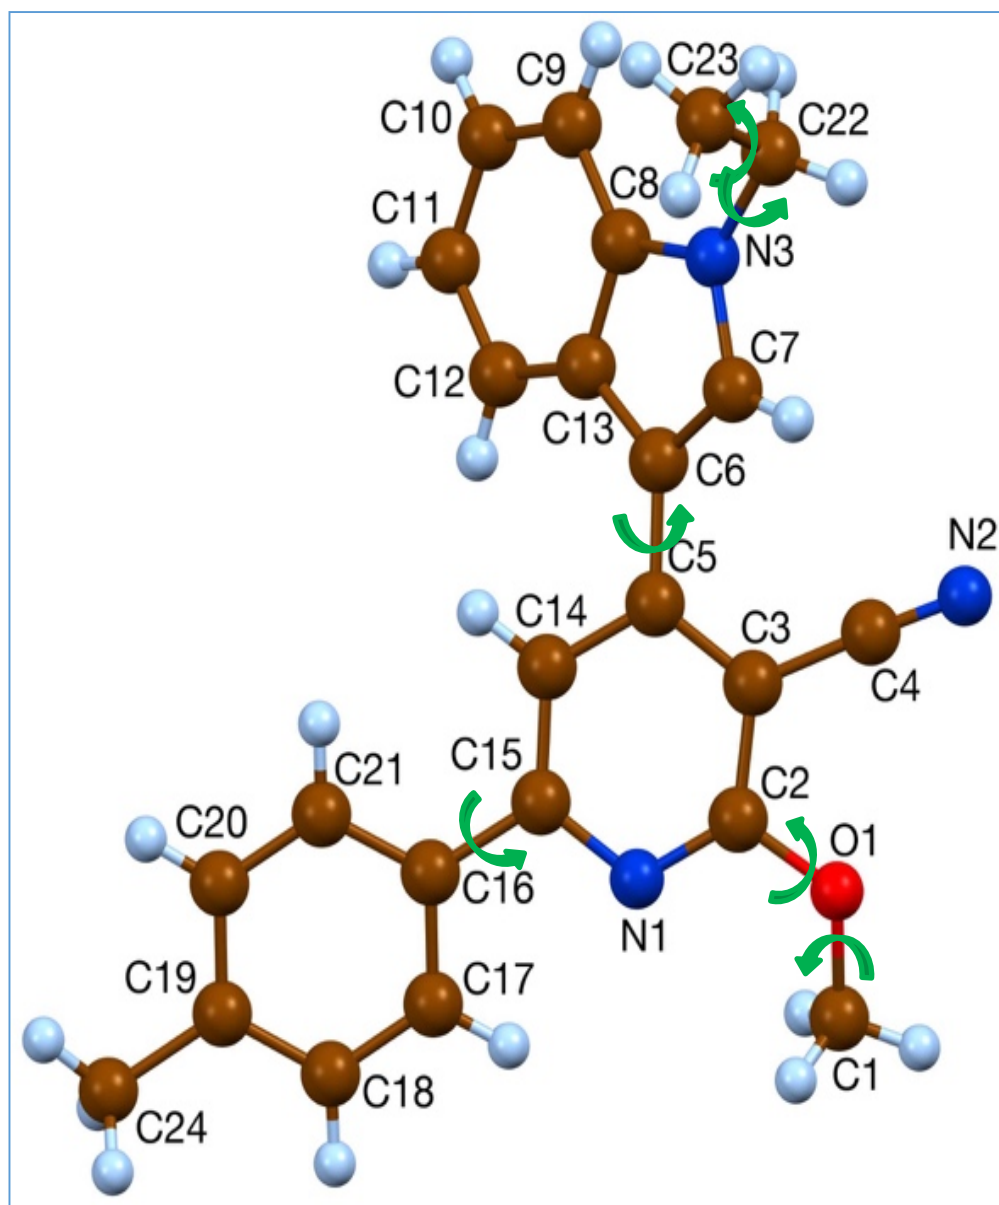

**Fig. S28.** The molecular structure of compound **4c** showing the atom-labeling scheme and the refined torsion angles (green arrows).

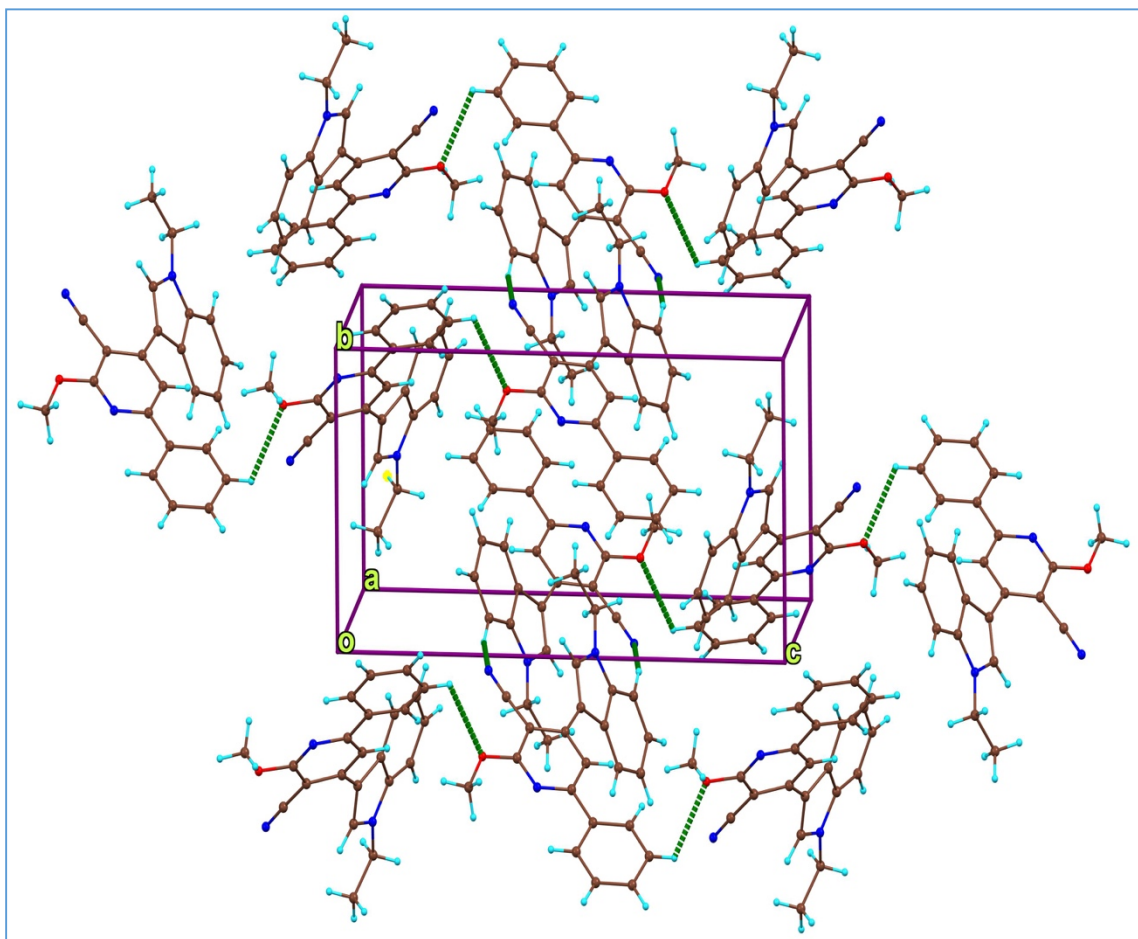

**Fig. S29.** Crystal packings in **4a**. Dashed lines denote intermolecular interactions.



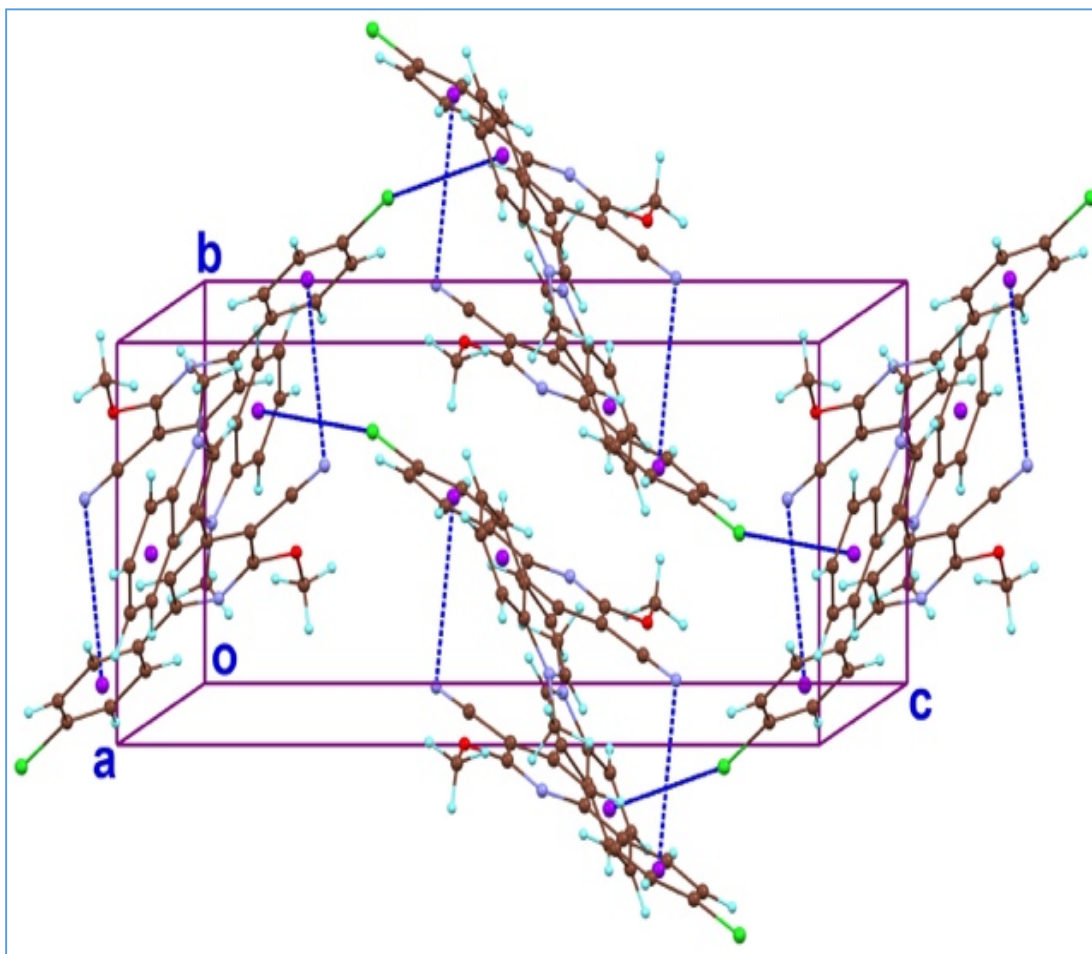

**Fig. S30.** Crystal packings in **4b**. Dashed lines denote intermolecular interactions.

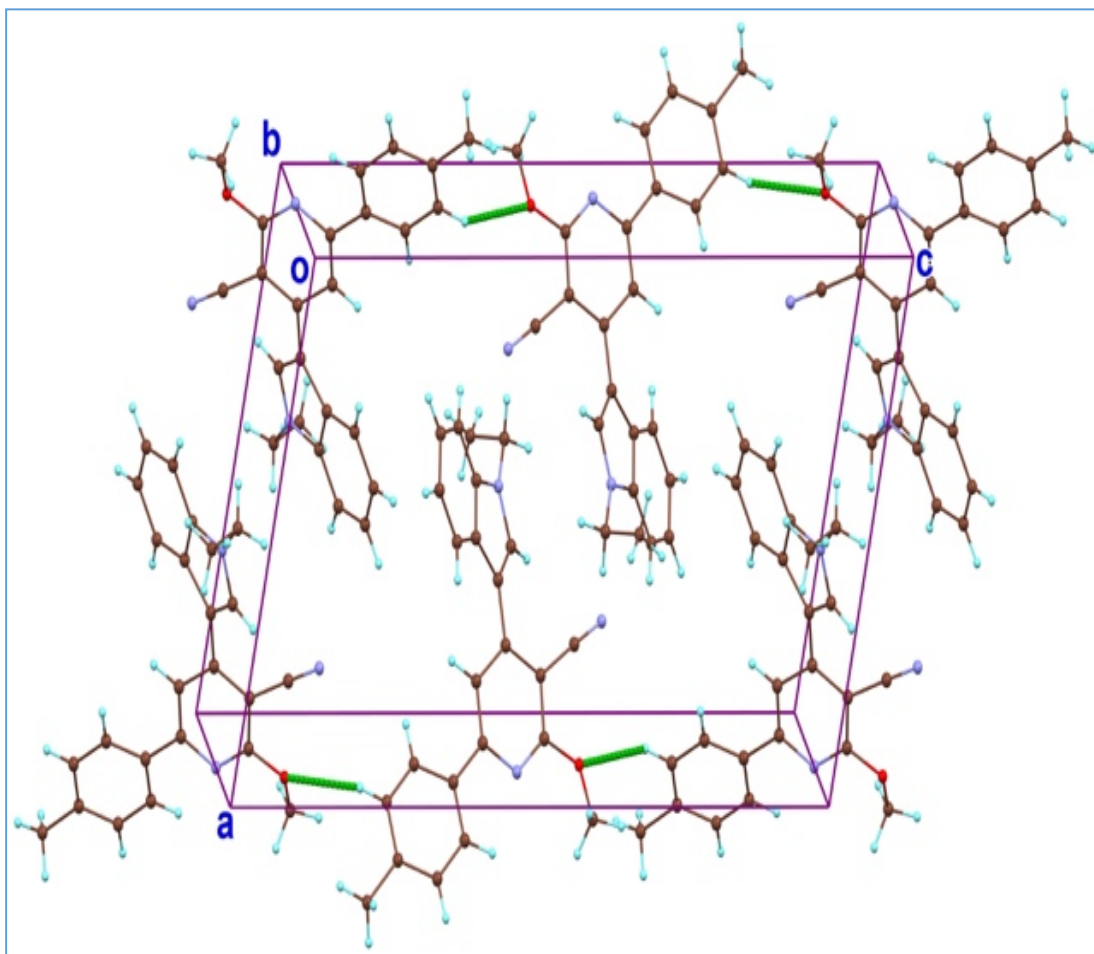

**Fig. S31.** Crystal packings in **4c**. Dashed lines denote intermolecular interactions.
